1 **A large panel of chicken cells are invaded *in vivo* by *Salmonella***

2 **Typhimurium even when depleted of all known invasion factors**

3 S. M. Roche<sup>1,2</sup>, S. Holbert<sup>1,2</sup>, Y. Le Vern<sup>1,2</sup>, C. Rossignol<sup>1,2</sup>, A. Rossignol<sup>1,3</sup>, P. Velge<sup>1,2</sup> and  
4 I. Virlogeux-Payant<sup>1,2\*</sup>

5 <sup>1</sup>*INRAE, UMR1282 Infectiologie et Santé Publique, F-37380 Nouzilly, France*

6 <sup>2</sup>*Université François Rabelais de Tours, UMR1282 Infectiologie et Santé Publique, F-37000*  
7 *Tours, France*

8 <sup>3</sup>*present address: Lycée Grandmont - Laboratoire de Biotechnologies, F-37204, TOURS,*  
9 *France*

10

11 \*For correspondence email

12 [isabelle.virlogeux-payant@inrae.fr](mailto:isabelle.virlogeux-payant@inrae.fr)

13

14 **Short title:** *In vivo* cellular invasion of *S. Typhimurium* in chicks

15

16 **Abstract**

17 *Salmonella* are among the most important foodborne pathogens and contaminated  
18 poultry meat and eggs are the main source of human infection. Infected poultry are a major  
19 problem as they are asymptomatic, thus rendering the identification of infected poultry farms  
20 difficult. In this context, controlling animal infections is of primary importance. It is known that  
21 cell and tissue tropism govern disease in many infectious models, our aim was therefore to  
22 identify the infected host-cell types in chicks and the role of the three known bacterial invasion  
23 factors in this process (T3SS-1, Rck and PagN). Chicks were inoculated with wild-type or  
24 isogenic fluorescent *Salmonella* Typhimurium mutant strains via the intraperitoneal route. Then  
25 infected cells in the liver, spleen, gall bladder and aortic vessels were identified using flow-  
26 cytometric analyses and invasion confirmed by confocal microscopy. Our results show that all  
27 these organs could be *foci* of infection and that a wide array of phagocytic and non-phagocytic

28 cells is invaded *in vivo* in each organ. These cells include immune cells and also epithelial and  
29 endothelial cells. Moreover, we demonstrated that, despite the invalidation of the three known  
30 invasion factors (T3SS-1, Rck and PagN), *S. Typhimurium* remained able to colonize internal  
31 organs and invade non-phagocytic cells in each organ studied. In line with this result, the mutant  
32 strains colonized these organs more efficiently than the wild-type strain. *S. Typhimurium*  
33 invasion of gall bladder cells was confirmed by immunohistochemistry and infection was  
34 shown to last several weeks after inoculation of chicks and at a level similar to that observed in  
35 the spleen. All together, these findings provide new insights into the dynamics of *Salmonella*  
36 spread *in vivo* in chicks at the organ and cellular levels.

37

### 38 **Author summary**

39 In many infectious models, cell and tissue tropism govern disease. Moreover, depending  
40 on the entry process, both bacterial behavior and host response are different. It is therefore  
41 important to identify the host cells targeted *in vivo* by a pathogen and the entry routes used by  
42 this pathogen to invade the different host cells. This is all the more important with a pathogen  
43 that enters cells in several ways like *Salmonella*, which is responsible for human and animal  
44 salmonellosis. As poultry meat and eggs are the main sources of human contamination,  
45 controlling animal infections is of primary importance. In this paper, we identified a large array  
46 of phagocytic and non-phagocytic cells targeted *in vivo* using fluorescent *Salmonella*  
47 Typhimurium strains inoculated by the intraperitoneal route. Surprisingly, the same host cells  
48 were infected by the wild-type strain or its isogenic mutants deleted of either the T3SS-1 or of  
49 the three known invasion factors (T3SS-1, Rck and PagN). These cells were immune cells but  
50 also epithelial and endothelial cells. Moreover, we demonstrated for the first time that the gall

51 bladder and the aortic vessels could be *foci* of infection in chicks in addition to the liver and  
52 spleen.

53

## 54 **Introduction**

55 *Salmonella* spp. are among the most important foodborne pathogens. From a public  
56 health perspective, according to the World Health Organization, *Salmonella* spp. are among the  
57 31 diarrheal and/or invasive agents (viruses, bacteria, protozoa, helminths, and chemicals)  
58 displaying the highest capability of triggering intestinal or systemic diseases in humans. Most  
59 cases of salmonellosis are mild, but sometimes the disease is life-threatening and salmonellosis  
60 is the third leading cause of death among food-transmitted diseases (1).

61 The two most commonly reported non-typhoidal serovars *Salmonella enterica* subsp.  
62 *enterica* serovar Enteritidis and *Salmonella enterica* subsp. *enterica* serovar Typhimurium  
63 (including its monophasic variant) accounted for almost 80% of human cases occurring in the  
64 EU (2). Depending on host factors and serovars, *Salmonella* can induce a wide range of diseases  
65 ranging from systemic to asymptomatic infections and gastroenteritis (3). In humans, localized  
66 infections can be followed by bacteremia in 3 to 10% of cases (4).

67 Animals are the primary source of these pathogens and humans become infected mainly  
68 by ingesting contaminated food. Poultry meat and eggs are the main source of human  
69 *Salmonella* contamination. In 2010, Knight-Jones *et al.* reported that poultry was implicated as  
70 an outbreak source in 10.4% of the total cases worldwide (5). Since 2018, it has remained the  
71 highest prevalence of *Salmonella*-positive single samples from official control investigations  
72 (2). The detection and eradication of *Salmonella* in poultry is difficult because *Salmonella*  
73 mostly induce an asymptomatic infection, accompanied by high fecal excretion, which is a  
74 source of transmission (6). This leads to contaminated poultry flocks that must therefore be

75 eradicated and all derived products destroyed, resulting in high economic losses. It is therefore  
76 particularly important to control animal infection not only to avoid economic consequences but  
77 also for the negative impacts for human health.

78 To establish infection in their hosts, *Salmonella* have to interact with several phagocytic  
79 and non-phagocytic eukaryotic cells. Invasion of these cells is considered as one of the most  
80 important steps in *Salmonella* pathogenesis. The most well-described invasion process requires  
81 the Type III Secretion System – 1 (T3SS-1) encoded by *Salmonella* pathogenicity island 1 (SPI-  
82 1). The T3SS-1 is a needle-like structure, which directly injects bacterial effector proteins into  
83 the host cytosol to manipulate the cell cytoskeleton, allowing bacterial internalization into non-  
84 phagocytic cells (7). Two other *in vitro* entry pathways, involving the Rck and PagN invasins,  
85 have also been described in *Salmonella* (8-10). Contrary to the T3SS-1, each invasin interacts  
86 with an eukaryotic receptor, EGFR and the heparinated proteoglycan for Rck and PagN,  
87 respectively (11, 12). *In vivo*, several reports particularly in mice have shown the key role of  
88 the T3SS-1 for *Salmonella* to cross the intestinal barrier (13, 14). Nevertheless, infections in  
89 the absence of T3SS-1 in mice, chicks and calves have also been described in several papers in  
90 which a mutant, defective for the T3SS-1, was shown to colonize its host as well as its wild-  
91 type parent (15-20). This observation has also been made in humans in whom food-borne  
92 disease outbreaks have been described with *Salmonella* Senftenberg isolates which lack  
93 segments of SPI-1 (21). In the same way, a study performed by Suez *et al.* comparing the  
94 pathogenicity of different non-typhoidal strains concluded that *Salmonella* virulence factors,  
95 including multiple T3SS effectors, were absent from several bacteremia isolates suggesting  
96 they are dispensable for invasive infection (22). Less is known about the role of the Rck and  
97 PagN invasins *in vivo* but *pagN* (formerly *iviVI-A*) and *rck* mutants are both less competitive  
98 than their wild-type parent in mice (23-25). However, apart from these roles identified at the

99 organ level, very little is known about the cells targeted by these invasion factors and this is  
100 even more true in farm animals.

101 This topic is crucial because cell and tissue tropism governs disease in many models  
102 (26, 27). Moreover, some studies have shown that depending on the entry mechanism both  
103 bacterial behavior and host response are different (28). It is therefore important to identify the  
104 host cells targeted by *Salmonella* and the different entry routes used by this pathogen to invade  
105 the different host cells. In order to improve understanding of how *Salmonella* infect chicks, our  
106 aim was to identify cells that could be targeted *in vivo* by this pathogen, expressing or not the  
107 known invasion factors. For this purpose, we used a fluorescent *S. Typhimurium* wild-type  
108 strain and its fluorescent mutant derivatives deleted of either the T3SS-1 alone or of the three  
109 known invasion factors (T3SS-1, Rck and PagN) to infect chicks intraperitoneally. Among the  
110 different organs, the spleen, liver and gall bladder were chosen to be potential foci of infection  
111 (29). Moreover, vessels from the aortic arch with the brachiocephalic trunk called “aortic  
112 vessels” in the article were also collected to analyze putative infection of endothelial cells. In  
113 these organs and vessels, identification of phagocytic and non-phagocytic cells and their  
114 invasion by the different bacteria were followed using flow cytometric analyses and confocal  
115 microscopy.

116

## 117 **Results – Discussion**

118 *Mutant strains defective for the T3SS-1 or the three known invasion factors inoculated by the*  
119 *intraperitoneal route, colonize chicks more effectively than their wild-type parent strain*

120 Previous work has shown that a  $\Delta invA$  mutant strain (T3SS-1 defective strain) and a  
121 strain deleted for the three known invasion factors ( $3\Delta$ ) remained invasive for several  
122 eukaryotic cell lines compared to the wild-type strain (30). To determine the ability of our wild-  
123 type strain and our mutant strains to invade *in vivo* several host cells, we chose to bypass the

124 intestinal barrier and to infect chicks by the intraperitoneal route. The first step was to evaluate  
125 the ability of these different strains to colonize vessels and several organs of chicks i.e. the  
126 spleen, liver and gall bladder (Fig 1). To ensure that the levels of bacteria were not related to  
127 the presence of *Salmonella* in the blood, all chicks were bled.

128         The first observation is that all strains were able to infect all the organs and vessels. For  
129 some animals, the infection rate even reached 8 log CFU/g, especially for the gall bladder.  
130 Moreover, all organ colonization levels were higher after inoculation with the  $\Delta invA$  strain  
131 compared to that with the wild-type strain (29, 35, 3.9 and 12 times more in the spleen, liver,  
132 aortic vessels, and gall bladder, respectively). All these differences were statistically significant.  
133 While the  $3\Delta$  strain also colonized these organs and vessels, more effectively than the wild-  
134 type strain (9.5, 13, 2.6 and 5.1 times more in the spleen, liver, aortic vessels, and gall bladder,  
135 respectively), a statistically significant difference was only identified in the liver. No significant  
136 statistical difference could be observed between the two mutants, beside the fact that the log  
137 CFU of bacteria/g for the  $3\Delta$  strain was always inferior to that of bacteria/g of organ for the  
138  $\Delta invA$  strain. The levels of CFU recovered in the gall bladder and the aortic vessels should be  
139 highlighted, as they have previously been rarely studied. These results demonstrated that all the  
140 tested organs and vessels are colonized by *S. Typhimurium* and that the two mutant strains  
141 ( $\Delta invA$  or  $3\Delta$ ) colonized deep organs of chicks after intraperitoneal inoculation at least at the  
142 same level as the wild-type strain.

143         This latter result could be attributed to the route of inoculation. Indeed, *Salmonella*  
144 injected *via* the intraperitoneal route easily reaches systemic sites such as the spleen and the  
145 liver. They could also reach the gall bladder through the vasculature or the hepatic duct (31). *In*  
146 *vivo* studies have demonstrated that the T3SS-1 is primarily associated with the early stage of  
147 infection in which it translocates T3SS1 effectors across the host intestinal epithelial cell  
148 membrane and stimulates intestinal inflammation (13) (14, 32-34) and is therefore important

149 for *Salmonella* colonization after animals are inoculated orally. Our results show that, in  
150 chicken, the colonization of deeper organs can be independent of this type III secretion system  
151 as no difference in colonization between a T3SS-1 mutant and its wild-type parent was observed  
152 as described after intraperitoneal or intravenous inoculation of mice. Several reports have also  
153 suggested that *Salmonella* remain pathogenic without an active T3SS-1 even after oral  
154 inoculation in several animal models, including chicks (19, 20, 35). Moreover, a *Salmonella*  
155 Senftenberg strain lacking T3SS-1 was isolated from a human clinical case and has been shown  
156 to be able to induce enterocolitis in a mouse model (21). In our case, one hypothesis that could  
157 explain the higher colonization of the mutant strains compared to the wild-type strain is that,  
158 after intraperitoneal inoculation, the absence of the T3SS-1 could induce a lower immune  
159 system alert, especially a lower inflammatory response and consequently less killing of  
160 bacterial. Indeed, SPI-1 genes are involved in the regulation of the host immune response, for  
161 example the host inflammatory response (36), immune cell recruitment (37) and apoptosis (38,  
162 39). Moreover, we already know that a SPI-1 mutant and also a *phoP* mutant, not expressing  
163 PagN like our  $3\Delta$  mutant, did not stimulate an inflammatory response in the caecum of chicks  
164 (40).

165

166 Cytometric analyzes and microscopy were then performed in order to determine whether  
167 *Salmonella* was within the cells of the different organs and vessels and to identify the cell-types  
168 infected. The infectious dose of  $6.10^7$  CFU/chick used for the previous *in vivo* experiment,  
169 represented a good compromise between the infectious dose and the period of slaughter (2  
170 days), in order to potentially detect enough intracellular bacteria for flow cytometry analyses.  
171 The animals were bled to decrease red blood cells and allow better detection of organ cells. The  
172 concentration of *S. Typhimurium*-TurboFP650-wild-type strain was checked in the blood of six  
173 animals. An average of  $1.95 \pm 1.09$  log CFU/mL was found.

174

175 *STM-Turbo FP650-WT and its mutant strains were within the cells and did not only adhered to*  
176 *the cells*

177 As our aim was to identify cells infected by *Salmonella*, we first assessed whether our  
178 protocol allowed us to identify intracellular bacteria or not. Indeed, flow cytometry is useful for  
179 quantitative analyses but it does not allow the intracellular localization of bacteria to be  
180 determined as adherent bacteria could exist. According to our protocol, it was highly unlikely  
181 that *Salmonella* would only be present extracellularly due to the methods used to purify and  
182 mechanically separate the cells, including filtrations and washings and, for some organs,  
183 enzymatic cleavage with two different enzymes (collagenase and dispase) were performed for  
184 cell purification. Theoretically, after all these treatments related to organ dissociation, only a  
185 few bacteria would remain adhered, suggesting that the large majority were intracellular.  
186 However, in order to confirm this, cell sorting based on the labeling of the cells and confocal  
187 analyzes were carried out for each cell type of each organ. For flow cytometry, regions  
188 corresponding to infected cells were identified with the PE-cy5 canal and were set according to  
189 uninfected control samples. The Alexa fluor 488 canal was used to identify the cell types  
190 according to the isotype-control staining. One example for each cell type is given in S1 Fig, S2  
191 Fig, S3 Fig, S4 Fig, S5 Fig and S6 Fig. Double-labeled cells were sorted using flow cytometry  
192 and observed with confocal microscopy. A Z-stack was re-sliced horizontally and vertically to  
193 obtain the projections of perpendicular views, confirming the intracellular presence of bacteria.  
194 This allowed us to observe intracellular *Salmonella* expressing red tag, in green labeled cells  
195 for all the cells considered. These results confirm the intracellular localization of the different  
196 strains and thus validate our protocol designed to identify and quantify the cell types infected  
197 by *Salmonella* in selected chick organs. Moreover, they show that *S. Typhimurium* can invade  
198 all the cell types studied in this paper, i.e. monocytes-macrophages, B and T lymphocytes,



199 thrombocytes, epithelial and endothelial cells of chicks. Currently, only a few papers have  
200 described the cells infected by *Salmonella in vivo* and most of these papers are in mouse models.  
201 In these articles, *Salmonella* were found mainly in macrophages and neutrophils from the liver  
202 and spleen of mice, but infected B and T lymphocytes were also identified (41-44).

203           A more detailed analysis of the confocal images allowed us to observe that in most  
204 cases infected cells, whatever the cell type, only harbored one to five bacteria per cell (Fig 2),  
205 but in a few, more bacteria were visualized. This result is consistent with results obtained in the  
206 literature on *Salmonella* infected macrophages *in vivo*. Indeed, in many experiments in mice,  
207 the majority of liver or spleen infected phagocytes contained relatively few bacteria (41-43,  
208 45), but the presence of many bacteria per cells has also been reported (42, 45, 46). Our results  
209 show that this heterogeneous number of bacteria per cell could be enlarged to non-phagocytic  
210 cells in chicks. However, in mice it seems that the number of bacteria per cell had a moderate  
211 impact on the infectious process as host cells that contain high numbers of bacteria have the  
212 same probability of undergoing lysis as cells containing only a few bacteria (47). Both highly  
213 and weakly infected cells contributed significantly to the *Salmonella* infection process and not  
214 only the macrophages (43).

215

#### 216 *Analysis of the infected cell types in the spleen*

217           In the chicken spleen, the distinction between the red and white pulp is less marked than  
218 in mammals. The red pulp mainly contains erythrocytes, granulocytes, macrophages, scattered  
219 T lymphocytes and plasma cells. However, the architecture of the avian white pulp differs  
220 considerably. Three morphologically distinct areas constitute the spleen. The first consists of  
221 peri-arteriolar lymphocyte sheaths, mainly containing T lymphocytes that surround arterioles,  
222 which have visible muscular layers. The second involves peri-ellipsoid lymphocyte sheaths  
223 (PELS) surrounding capillaries, lacking muscular tissue and lined by cuboidal endothelium and

224 reticulin fibers. The last consists of follicles with germinal centers, surrounded by a capsule of  
225 connective tissue. PELS and follicles mainly contain B lymphocytes (48).

226         In the spleen, the six antibodies used in our study allowed us to detect about 86% of the  
227 total cells. Epithelial cell labeling was not necessary, as these cells were not expected to be  
228 present. B lymphocytes (average of 8%), T lymphocytes (average of 22%) and endothelial cells  
229 (average of 30%) were identified the most, as expected (Fig 3A). Compared to the non-infected  
230 chicks, the percentage of labeled cells was similar in the groups of chicks inoculated with the  
231 wild-type bacteria, the single or triple mutant bacteria. The only statistical difference was  
232 observed for the percentage of thrombocytes between the uninfected chicks and the chicks  
233 infected with the wild-type strain ( $p=0.049$ . S1 Table). The small decrease in the number of  
234 thrombocytes after infection with the wild-type strain, was similar to that observed with the two  
235 mutants, but the number of independent experiments was probably not sufficient to obtain a  
236 statistical difference between the uninfected group and the chicks inoculated with these  
237 *Salmonella* mutants. Similarly, the lower percentage of macrophages observed after infection  
238 with the 3 $\Delta$  mutant strain was not significant. Either the absence of cell recruitment is real in  
239 chicks or it could be related more to the fact that the infected cells were identified only two  
240 days after the intra-peritoneal inoculation. The infection rates observed for all the identified  
241 cells (lymphocytes, macrophages, thrombocytes, and endothelial cells) were between 0.1 and  
242 1%. Monocytes and macrophages were proportionally the most infected cells (about five times  
243 more than the other cell types), but endothelial cells, and B and T lymphocyte cells were the  
244 most infected cells in the spleen as their absolute number was higher than that of monocytes-  
245 macrophages in this organ. No statistical differences were observed according to the *Salmonella*  
246 strains tested (Fig 3B). The fact that monocytes-macrophages were identified as being  
247 proportionally the most infected cells of the spleen was not surprising. In mice, it is commonly  
248 assumed that the systemic spread of *Salmonella* is contingent upon dissemination and survival

249 within macrophages. Indeed, survival in macrophages is essential for virulence (49). However,  
250 contrary to what was assumed, our work, clearly demonstrated that other cell types, such as  
251 lymphocytes, thrombocytes and endothelial cells could also be infected by *Salmonella* in  
252 chicken spleen. As monocytes and macrophages are phagocytic cells, the fact that there was no  
253 difference in the percentage of monocyte-macrophage infected cells between the mutants and  
254 the wild-type strain was to be expected. By contrast, B and T lymphocytes, thrombocytes and  
255 endothelial cells are non-phagocytic cells and thus a difference in the percentage of cells  
256 infected by the different strains could have been expected. However, Geddes *et al.* have also  
257 described in mice the internalization of *Salmonella* in splenic B and T cells, independently of  
258 the T3SS-1 (44). Our work suggests that this observation could be extended to other non-  
259 phagocytic cells of other animal species.

260

#### 261 *Analysis of the infected cell types in the liver*

262 The liver is divided into a right and a left lobe. Each lobe of the liver has approximately  
263 100,000 lobules separated from each other by interlobular *septum*. These lobules are formed by  
264 parenchymal cells (hepatocytes), which represent 80% of the total liver volume and non-  
265 parenchymal cells localized in the sinusoidal wall. These sinusoidal walls are the vascular side  
266 of the hepatocytes and they are composed of endothelial cells and macrophages. These  
267 macrophages are star-shaped and confined to the liver. Called Kupffer cells, they phagocyte  
268 pathogens, cell debris and damaged red and white blood cells (50).

269 In the liver, the six antibodies used allowed us to detect about 76% of the cells and we  
270 detected as many epithelial cells (average of 31%) as endothelial cells (average of 33%) (Fig  
271 4A). As expected, these were the main cell types identified. Few monocytes-macrophages were  
272 identified. One hypothesis is that the KUL01 antibody poorly recognizes the Kupffer cells (51).  
273 Another hypothesis is that their percentage compared to epithelial and endothelial cells is very

274 low in the liver. There were also very few, if any, T lymphocytes. In humans and mice,  
275 lymphocytes are present in small quantities at the level of the sinusoids and the space of Disse  
276 (perisinusoidal space) and histological investigation does not suggest that there are many  
277 immunologically relevant cells present (52). Liver-resident lymphocytes serve as sentinels and  
278 perform immunosurveillance in response to infection and non-infectious insults, and are  
279 involved in the maintenance of liver homeostasis (53). Our low level of T lymphocytes in the  
280 liver is most probably related to the fact that our observations were made two days after the  
281 intraperitoneal inoculation and that our chicks were only six days old and therefore  
282 immunologically immature. For all cell types, in the liver, the percentage of labeled cells was  
283 quite similar, whatever the infected or uninfected status of the animals. Only a statistical  
284 difference for the percentages of labeled epithelial cells between the uninfected chicks and those  
285 infected with the *invA* mutant was observed ( $p=0.039$ , S1 Table). Like in the spleen, we were  
286 able to observe similar levels of infected cells between chicks inoculated with the wild-type  
287 strain or with the two mutant strains deleted of the known entry factors. Compared to the spleen,  
288 the percentages of labeled infected cells were more heterogeneous (Fig 4B). In particular, the  
289 percentages of infected monocytes-macrophages and B lymphocytes were around 3%, while  
290 the percentages of infected epithelial and endothelial cells were 0.10% and 0.24%, respectively.  
291 Nevertheless, as these latter cell types are more frequent in the liver than monocytes-  
292 macrophages and B lymphocytes (Fig 4A), endothelial and epithelial cells represent a large  
293 proportion of the infected cells in the liver. The monocytes-macrophages of the liver are  
294 responsible among others, for the phagocytosis of pathogens and thus, it is not surprising that  
295 they were found infected, with no differences whatever the strain inoculated. In contrast, the  
296 thrombocytes were very weakly infected here.

297 All together, these results strengthen those observed in the spleen, showing that at least  
298 four different cell types, i.e. monocytes-macrophages, B lymphocytes, endothelial and  
299 epithelial cells, were infected by *Salmonella* in the liver of chicks.

300

### 301 *Analysis of the infected cell types in the aortic vessels*

302 The term “aortic vessels” in our paper corresponds in fact to the aortic arch and the  
303 brachiocephalic trunk. In contrast to mammals, two brachiocephalic trunks arise from the arch  
304 of the aorta and give rise to the common carotid and subclavian arteries in birds (54). This  
305 “organ” was chosen as a source of endothelial cells.

306 For this organ, only 55% of the cells were identified through flow cytometric analysis.  
307 This low percentage of identified cells was mainly related to the presence of smooth muscle  
308 fibers in vessels for which no any antibodies exist for the chicken. The *adventitia*, which is the  
309 outer layer of the arterial wall, is made up of connective tissue and elastic fibers. It contains  
310 capillary vessels vascularizing the arterial wall as well as nerve fibers of the sympathetic and  
311 parasympathetic autonomic system. According to the size of the arteries, the media, which is  
312 the middle layer of the arterial wall, is made up of collagen, elastin or smooth muscle fibers  
313 allowing vasoconstriction. The *intima*, the inner layer of the arterial wall separated from the  
314 media by the internal elastic limiter, is formed of the vascular endothelium (cell monolayer)  
315 resting on a layer of connective tissue (55).

316 The percentages of labeled cells in aortic vessels according to the chick group illustrated  
317 in Fig 5A were more dispersed than for the previous two organs, probably due to the treatment  
318 of the aortic vessel with enzymes, which made extraction less easy. Monocytes-macrophages  
319 and endothelial cells were the most representative type of cells labeled, but all cell types were  
320 identified (Fig 5A). This is the first organ in which we could observe a difference between the  
321 percentages of monocytes-macrophages according to the uninfected or infected status of the

322 animals. Contrary to the spleen and the liver, the percentage of labeled monocytes-macrophages  
323 showed statistically significant differences between the uninfected chicks and those infected  
324 with the wild-type strain, on one hand, ( $p = 0.035$ . S1 Table) and those infected with the 3 $\Delta$   
325 mutant, on the other hand ( $p = 0.043$ . S1 Table). Despite a high percentage of labeled  
326 endothelial cells, few if any were infected. By contrast, all the other cell types were infected  
327 and to a greater proportion than in the spleen and liver (Fig 5B). Indeed, compared to the spleen  
328 and liver, the median percentage of each infected cell type in the aortic vessels, except  
329 endothelial cells, varied from 1 to 10% versus 0.1 – 1% in the spleen or 0 to 3% in the liver.  
330 Surprisingly, in some chicks more than 10% of lymphocytes, thrombocytes and epithelial cells  
331 were infected.

332         These results clearly show that, like in the spleen and liver, numerous cell types are  
333 infected in vessels.

334

### 335 *Analysis of the infected cell types in the gall bladder*

336         The avian gall bladder is attached to the right liver lobe. Histologically, the avian gall  
337 bladder is composed of three *tunicae*. The first, the *tunica mucosa* is mainly lined with non-  
338 ciliated simple columnar epithelium and consists of a layer of connective tissue with elastic and  
339 muscle fibers. The second, the *tunica muscularis* consists of smooth muscle fibers and abundant  
340 intervening connective tissue. The third, the *tunica serosa* consists of coarse collagen fiber and  
341 elastic fibers. All epithelial cells are basally located and contain an oval nucleus. Bile is  
342 synthesized in the hepatocytes and secreted into bile canaliculi located on the lateral surfaces  
343 of adjoining liver cells (56). Relatively little is known about biliary secretion in birds due to the  
344 complex anatomy in which bile enters the intestine via both hepato-enteric and cystico-enteric  
345 ducts. In ruminants, pigs and poultry, there is relatively continuous secretion of bile into the  
346 intestine (50).

347 About 75% of cells were identified with the available antibodies. Numerous  
348 “unidentified cells” would most probably correspond to fibroblasts. Endothelial cell labeling  
349 was not performed, as they were not expected to be found in the gall bladder. By contrast, all  
350 other cell types were identified. The epithelial cells represented about 60% of the identified  
351 cells and the percentages of thrombocytes and monocytes-macrophages were between 1 and  
352 10% (Fig 6A). B and T lymphocytes were less present. As for the aortic vessels, the variability  
353 between animals was considerable, certainly due to the breakdown of organs with different  
354 enzymes, which made extraction less reproducible. As in the other organs (except for the  
355 percentages of monocytes-macrophages in the aortic vessels), there were no differences in the  
356 percentages of the labeled cells between uninfected and infected chicks. By comparing the  
357 inoculated chicks, only one statistically significant difference was observed for the percentage  
358 of T lymphocytes between the chicks inoculated with the single or the triple mutant ( $p = 0.041$ .  
359 S1 Table). Immune cells were highly infected. For example, about 10% of the B and T  
360 lymphocytes were infected by the different strains. Moreover, B and T lymphocytes in the gall  
361 bladder were found to be more infected than in the other organs. The other identified cells were  
362 infected between 1 and 10 % (Fig 6B). In all cases, except one, no statistical differences were  
363 observed between the chicks inoculated with the wild-type or the mutant strains. The only  
364 significant statistical difference was observed for the infected monocytes-macrophages between  
365 the chicks infected with the wild-type strain and those infected with the *invA* mutant strain ( $p =$   
366  $0.020$  – S1 Table). This could be due to the fact that only two  $\Delta invA$ -inoculated animals had  
367 infected monocytes-macrophages, while the percentages of monocytes-macrophages were  
368 similar for the five animals tested. Another interesting point is that the analyses of the infected  
369 areas (labeled + unlabeled) highlighted the high cell invasion rates of the gall bladder (Tab 1).  
370 Cumulating all experiments, after two days of infection, the median percentages of all infected

371 cells (labeled and unlabeled) in the gall bladder were 2.23%, 1% and 3.65% depending on the  
372 strain inoculated, whereas in the spleen, for example, they were only 0.35%, 0.19% and 0.31%.

373 As this organ had never been described as a site of *Salmonella* colonization in chicks  
374 and as it is described as an organ that is important for *Salmonella* persistence in mice and  
375 humans (57, 58), we decided to observe the infected tissues using immunohistochemistry.  
376 Microscopic analysis shows that bacteria were located in the epithelium just above the *mucosa*  
377 of the gall bladder but also in the *lamina propria*, whatever the strain inoculated. Interestingly,  
378 when high numbers of *Salmonella* were detected, the epithelium was damaged while the  
379 structure of the gall bladder was well conserved when the tissue was only infected by a few  
380 bacteria (Fig 7).

381 The gall bladder is thus colonized by *Salmonella* after chicks are inoculated via an  
382 intraperitoneal route. These results show that oral inoculation of *Salmonella* is not necessary  
383 for gall bladder infection. The bacteria reached the gall bladder through the vasculature or the  
384 ducts that emanate from the liver. Menendez *et al.* obtained similar results in a mouse infection  
385 model (59). Indeed, they demonstrated that gallbladder colonization was not the result of  
386 *Salmonella* ascending directly from the gastrointestinal tract and their histological analyzes  
387 supported the idea that bacteria were discharged from the liver into the gall bladder *via* the bile.  
388 Concerning the infected cells in the chick gall bladder, monocytes-macrophages, B and T  
389 lymphocytes, thrombocytes and epithelial cells of this organ were all infected at a relatively  
390 high level compared to the other organs and epithelial cells were the most infected cell type.  
391 Menendez *et. al* also observed in their mouse model that *Salmonella* localized preferentially  
392 within epithelial cells of the gallbladder. However, bacteria were rarely seen within the *lamina*  
393 *propria* (59). Our observations of some *S. Typhimurium* in the *mucosa* and *submucosa* and the  
394 identification of infected monocytes-macrophages, B and T lymphocytes, and thrombocytes  
395 demonstrate that epithelial cells are not the only cells infected in the gall bladder of chicks.



396 Whether this result is restricted to chicks or not remains to be determined. Our results on our  
397 mutant strains are also different from that of Menendez *et al.* (59). Indeed, our mutants were  
398 shown to infect similar cells to the wild-type, while Menendez *et al.* did not observe their *invA*  
399 mutant in the epithelial cells of the murine gall bladder, in contrast to their wild-type strain,  
400 suggesting that T3SS-1 could be required for *Salmonella* colonization of the gall bladder in  
401 mice but not in chicks.

402 The gall bladder is known to be an organ in which *S. Typhi* persist during chronic  
403 infections in humans, after forming a biofilm on gallstones (31, 58, 60). Models of chronic  
404 infection in mice have also been studied (57, 59, 61). In guinea pigs, although asymptomatic,  
405 *Salmonella* could be recovered in the gall bladder for up to 5 months post-infection (62).  
406 However, it is not known whether this organ could be relevant for the persistence of *Salmonella*  
407 in chicken.

408 Table 1. Percentages of infected cells (labeled and unlabeled) according to the organ

|               | Spleen            | Liver             | Aortic vessels    | Gall bladder      |
|---------------|-------------------|-------------------|-------------------|-------------------|
|               | Median (Q1; Q3)   | Median (Q1; Q3)   | Median (Q1; Q3)   | Median (Q1; Q3)   |
| WT            | 0.35 (0.19; 0.53) | 0.07 (0.06; 0.10) | 0.64 (0.42; 2.49) | 2.23 (1.54; 2.82) |
| $\Delta invA$ | 0.19 (0.14; 0.55) | 0.06 (0.04; 0.16) | 0.21 (0.12; 1.46) | 1.00 (0.52; 2.71) |
| 3 $\Delta$    | 0.31 (0.26; 0.38) | 0.06 (0.04; 0.16) | 2.18 (1.18; 2.54) | 3.65 (2.39; 4.62) |

409

410

411 *Salmonella Typhimurium* is able to persist in the gall bladder independently of the T3SS1, Rck  
412 and PagN.

413 As the previous results demonstrated that bacterial concentrations in the gall bladder  
414 were significant (Fig 1) and that *Salmonella* was able to infect several cell types in this organ,  
415 we verified whether this organ could be infected over the long term. To determine persistence

416 in this organ, we infected chicks and monitored their colonization rate in the spleen and gall  
417 bladder for 36 days with slaughtering every 8 days. Bacteria were detected throughout the  
418 kinetics. No statistical differences of colonization could be observed in the spleen (Fig 8A) or  
419 in the gall bladder (Fig 8B), whatever the strain inoculated and the week of analysis. This work  
420 demonstrates for the first time, that *Salmonella* Typhimurium could invade the gall bladder of  
421 chicks at levels and durations similar to those observed in the spleen and thus, can be considered  
422 as a site of colonization in addition to the spleen and the liver in chicks. In mice, during chronic  
423 infection, mimicking human *S. Typhi* infection, the spleen and the gall bladder are considered  
424 as organs of persistence and gall bladder colonization presumably leads to re-infection of the  
425 intestine through bile secretion (46, 57, 63). Our results also demonstrated that, for the gall  
426 bladder to be infected, an oral route of infection is not necessary, as demonstrated by Menendez  
427 *et al.* in a mouse model (59). The role of this organ colonization needs to be analyzed further  
428 especially in relation to *Salmonella* intestinal colonization and persistence.

429

### 430 **Concluding remarks**

431 This work demonstrates for the first time, that *S. Typhimurium* can invade *in vivo* a  
432 large array of phagocytic and non-phagocytic cells of different organs and vessels in chicks.  
433 These cells are immune cells but also epithelial and endothelial cells as previously demonstrated  
434 *in vitro* with cell lines (30). Moreover, numerous unidentified cells were infected. This is due  
435 to the lack of antibodies in chicken to identify among others, dendritic cells, fibroblasts, and  
436 heterophils, which are also important cells for the spread of the bacterium (46, 64, 65).  
437 Development of new antibodies is required for further studies in chicks. Nevertheless, our  
438 results show a great difference between mice and chicks. In mice, phagocytic cells and  
439 especially macrophages are the main cells in which *Salmonella* replicate in the liver and spleen  
440 (41-43, 46). In chicks, the cell tropism in these organs, as well as in the gall bladder and vessels,

441 is more diverse as *Salmonella* were found intracellularly in monocytes-macrophages but also  
442 in lymphocytes, endothelial cells and epithelial cells. Whether macrophages are the privileged  
443 localization of *Salmonella* or not in organs other than the liver and spleen in mice remains to  
444 be determined.

445 Even if *Salmonella* are able to invade numerous cells, specificity occurs depending on  
446 the organ. Indeed, for example, during a *Salmonella* infection, epithelial cells appeared more  
447 sensitive in the gall bladder than in the liver. In the same way, endothelial cells appeared more  
448 sensitive in the spleen than in the aortic vessels.

449 Surprisingly, the two mutant strains used in this study, i.e. a T3SS-1 mutant strain and  
450 a mutant strain defective for the three currently known invasion factors, were able to invade the  
451 same host cells as the wild-type strain. The fact that the triple mutant strain enters numerous  
452 host cells, *in vivo*, confirms our previous results suggesting the existence of unknown invasion  
453 factors. Indeed, we previously demonstrated that, despite the invalidation of the T3SS-1, Rck  
454 and PagN, *S. Typhimurium* remained able to invade, *in vitro*, some non-phagocytic cell lines  
455 of several animal and tissue origins at a similarly high level as the wild-type (30). However, we  
456 cannot conclude that the T3SS-1, PagN and Rck are not required for the invasion of chicken  
457 cells as a redundant role of the different invasion factors may occur. These two hypotheses are  
458 reinforced by our results of chicken infection demonstrating that chicks can be colonized at a  
459 higher level by the two mutant strains than by their wild-type parent after intraperitoneal  
460 inoculation. The absence of T3SS-1 requirement for chicken colonization has already been  
461 observed (18-20) and this fact can now be broadened to the PagN and Rck invasins. However,  
462 in order to demonstrate the redundant role or not of these entry factors, further studies are  
463 necessary in chicks and other animals. Altogether, these results are important in the  
464 understanding of the mechanisms of *Salmonella* pathogenesis, as it has been described that  
465 depending on the entry mechanism, both bacterial behavior and host response are different (28)

466 and thus opening up new avenues of research. On the one hand, it raises the question as to  
467 whether the bacterial factors required for chicken cell invasion of systemic sites are still  
468 unknown and, if so, whether certain cell types are infected *in vivo* by a particular entry  
469 mechanism. On the other hand, could the known invasion factors in chicks be redundant? In  
470 addition, does this mean that because cells can be infected through multiple pathways in an  
471 organ, their response is multiple? Further studies involving Tnseq-mutant library screenings  
472 and single cell approaches would help to address these questions.

473

## 474 **Materials and methods**

### 475 **pFPV-TurboFP650 plasmid construction**

476 Gene encoding TurboFP650 was amplified from the plasmid pTurboFP650-N  
477 (Evrogen, Euromedex, France) with primers TurboFP650-XbaI  
478 5'TGCTCTTAGATTTAAGAAGGAGATATAGATATGGGAGAGGATAGCGAGCTG3'  
479 and TurboFP650-SphI 5'CATGCATGCTTAGCTGTGCCCCAGTTTGCTAGG3'. Then, the  
480 PCR product and the pFPV25.1 plasmid (66) were restricted by XbaI and SphI restriction  
481 enzymes, ligated and transformed into *E. coli* MC1061 (67). pFPV-TurboFP650 recombinant  
482 plasmids were selected on Trypticase Soya Agar (TSA - BioMérieux) containing 100 µg/mL  
483 of carbenicillin (Sigma-Aldrich) and clones which showed a purple color were selected for  
484 restriction analysis. Clones with good restriction profiles were then sequenced to confirm the  
485 absence of mutations in the TurboFP650 coding sequence.

486

### 487 **Strains used and inocula preparation**

488 The pFPV-TurboFP650 plasmid was introduced in *S. Typhimurium* 14028 wild-type  
489 (WT), the  $\Delta invA::kan$  mutant ( $\Delta invA$ ; T3SS-1 defective) or the  $\Delta invA::kan \Delta pagN::cm \Delta rck$   
490 mutant (3 $\Delta$ ) (30).

491 To prepare the inocula, the strains were cultured in Trypticase Soya Broth (TSB -  
492 BioMérieux) supplemented with carbenicillin 100 µg/mL for 24h at 37°C with shaking. The  
493 cultures were centrifuged at 4500g for 20 min at 20°C and the pellets were suspended in  
494 phosphate buffered saline (PBS) containing 50% glycerol. The bacterial suspensions were then  
495 aliquoted, frozen and stored at -80°C. The frozen aliquots from the same initial inoculum were  
496 used throughout the experiments.

497

#### 498 **Ethics statement**

499 The experiments with chickens were carried out in strict accordance with French  
500 legislation. All animal care and use adhered to French animal welfare laws. The protocols for  
501 this study were approved by the French Ministry of Education, Higher Education and  
502 Research (Ministère de l'Education Nationale, de l'Enseignement Supérieur et de la Recherche)  
503 under the protocol number APAFIS #19834-2019031911108197 v3. The principles of  
504 reduction, replacement and refinement were implemented in all the experiments. Chicks were  
505 sacrificed by decapitation and bleeding.

506

#### 507 **Experimental infection**

508 Five-day-old PA12 White Leghorn chicks, provided by the Experimental Platform for  
509 Infectious Disease (UE 1277 - INRAE) were intraperitoneally inoculated with 0.2 mL of  
510 bacterial suspension. On the day of inoculation, a frozen aliquot of the inoculum was thawed.  
511 Bacteria concentrations were standardized turbidimetrically and diluted to a concentration of  
512  $6.10^7$  CFU/0.2 mL in PBS. Chicks were maintained in medium isolator systems (0.83 m<sup>2</sup>) with  
513 controlled environmental conditions (feed, water, temperature, air humidity and lighting  
514 scheme) for two days before sacrifice by decapitation and bleeding. To follow the persistence  
515 in the gall bladder, the inoculation dose was  $3.10^7$  CFU/chick, in order to reduce the mortality

516 of chicks observed with the higher dose. The kinetics of organ colonization was followed each  
517 week over a period of 36 days.

518

### 519 **Enumeration of bacterial load in infected organs**

520 On the day of sacrifice, control animals of the same age (i.e. not inoculated) were  
521 provided by the Experimental Platform for Infectious Disease. Spleens, livers, gall bladders and  
522 the aortic vessels were collected aseptically from each animal for quantification of bacterial  
523 load.

524 To determine the bacterial load, organs were homogenized in TSB and serial 10-fold  
525 dilutions were plated on TSA or *Salmonella–Shigella* medium supplemented with carbenicillin  
526 100 µg/mL. The colonies per plate were counted after incubation for 24 h at 37°C. Counts were  
527 expressed as log (CFU) per g of organ.

528

### 529 **Preparation of cells for flow cytometry**

530 For the flow cytometric analyses, organ-specific samples were obtained by pooling the  
531 spleens, livers, aortic vessels and gall bladders of the different chicks in Hanks' buffered saline  
532 solution (HBSS) without Ca<sup>2+</sup> and Mg<sup>2+</sup> in the dark at 4°C in order to be able to analyze at least  
533 200,000 cells for each organ. Independent infections were repeated at less three times. Gall  
534 bladders and aortic vessels were cut into small pieces and samples put in collagenase A (0.3%  
535 - Sigma) – dispase I (1 U/mL - Sigma) – HBSS for 30 min at 37°C. The whole purification  
536 process was performed at 4°C. All organs were then homogenized in HBSS using syringe  
537 plungers and filtered through 40-µm-mesh cell strainers (Falcon), before being transferred into  
538 a 50-ml centrifuge. After centrifugation at 1000g for 15 min, cells were washed, resuspended  
539 in HBSS at approximately 5.10<sup>6</sup> – 1.10<sup>7</sup> cells / mL and maintained in the dark at 4°C.

540

## 541 **Flow cytometric analyses**

542 Cells were characterized according to the antibodies available in poultry (S2 Table).  
543 Mouse Anti-Chicken antibody, clone KUL01 specifically recognizes chicken monocytes,  
544 macrophages and interdigitating cells (68). Anti- CT3 antibody targets the avian homolog of  
545 the CD3-antigen, a common antigen used to identify T lymphocytes (69). Clone AV20 antibody  
546 recognizes the antigen Bu-1, a chicken B-cell marker, commonly used to identify B  
547 lymphocytes (70). Mouse anti-chicken CD41/61 clone 11C3 recognizes chicken integrin  
548 CD41/61 that is expressed on chicken thrombocytes and cells of the thrombocyte lineage (71).  
549 Mouse anti L-CAM antibody recognizes an 81 kDa N-terminal tryptic fragment of L-CAM, an  
550 epithelial cell marker, from embryonic chicken liver plasma membranes (72) and last VE-  
551 Cadherin is an intercellular junction marker of endothelial cells. This is a synthetic peptide  
552 corresponding to Human VE-Cadherin amino acids from position 750 to the C-terminus  
553 conjugated to keyhole limpet hemocyanin. Rabbit polyclonal antibody anti-VE-cadherin clone  
554 reacts with mouse, chicken and human VE-Cadherin.

555 The anti-Bu-1 and the anti-CD3, that allow B and T lymphocytes to be identified, were  
556 FITC conjugated. Antibodies that allow identification of monocytes-macrophages,  
557 thrombocytes, epithelial and endothelial cells, required an Alexa Fluor™ 488 conjugated anti-  
558 secondary anti-mouse or anti-rabbit antibodies. The endothelial cell samples were pre-treated  
559 with 20% horse serum. The primary antibodies were incubated with cells for 90 min at 4°C in  
560 the dark and then rinsed in HBSS. When necessary, secondary antibodies were added for 90  
561 min at 4°C in the dark, and then rinsed. Appropriate isotype control antibodies (S2 Table) were  
562 used to determine the levels of unspecific staining in all the experiments. Parallel samples were  
563 stained with a Fixable Viability Dye Cell Staining eFluor 450 (eBioscience (65-0863)) to  
564 determine the settings for a live cell gate based on light scatter properties. All samples were  
565 then filtered through 60-µm nylon Blutex just before flow cytometric analyses were performed

566 using a BD LSR Fortessa™ X-20 (BD Biosciences, San Jose, CA, USA). BD FACSDiva™  
567 software (v 8.0.2) was used to analyze the cytometric data. Infected and control samples were  
568 manipulated under the same conditions.

569

570 **Identification and relative quantification of infected and non-infected cells by flow**  
571 **cytometry**

572 For each sample, dot plots were analyzed. The intensity of green fluorescence (FITC or  
573 Alexa Fluor™ 488) is on the vertical axis, plotted against the intensity of red fluorescence  
574 (TurboFP650) on the horizontal axis. Labelled infected cells thus emitted both green and red  
575 fluorescence. They were revealed as dots in the upper right-hand part of the graph. For each  
576 experiment in each organ, a gate was determined removing inappropriate labeling - debris based  
577 on morphological criteria. Regions were set according to uninfected control samples and  
578 isotype-control staining. In order to have quantitative results, 200,000 events were analyzed for  
579 each sample for all staining. Examples are provided for some cell-type/organ labeling (for  
580 monocytes-macrophages (S1 Fig) and thrombocytes (S2 Fig) in the gall bladder, B lymphocytes  
581 (S3 Fig) and T lymphocytes (S4 Fig) in the spleen, epithelial cells in the liver (S5 Fig) and  
582 endothelial cells in the aortic vessels (S6 Fig)). Quantification of the percent of positively  
583 labeled cells was then calculated by subtracting the number of cells in the control areas from  
584 those in the positive labeled areas. The positive labeling areas of B and T lymphocytes cells  
585 were established using a control mouse IgG1-FITC conjugate, whereas the positive labeling  
586 areas of monocytes-macrophages, thrombocytes and epithelial cells were determined with a  
587 control mouse IgG1-Alexa Fluor™ 488 conjugate. For the labeling of the endothelial cells, we  
588 used rabbit IgG, followed by a secondary antibody, an anti-IgG-Alexa Fluor™ 488 conjugate.  
589 The total percentages of infected cells, positive labeled or unlabeled were also determined. All



590 negative responses were scored at 0.001% to account for the threshold and allow for a  
591 logarithmic representation of the results. The medians are represented by a red dash.

592

### 593 **Purification of the infected cells and confocal laser-scanning analysis**

594 Cells were sorted using a high-speed cell sorter, MoFlo Astrios<sup>EQ</sup> (Beckman Coulter  
595 Inc, Brea, CA, USA) equipped with four lasers: violet (405nm), blue (488nm), yellow-green  
596 (561nm) and red (640nm) and placed under a class II biological safety cabinet. We used a nozzle  
597 of 90 µm and selected a sheath pressure of 40 psi. Sorted cells were collected in 1.5 ml  
598 Eppendorf tubes containing 350 µL of HBSS medium supplemented with 10% fetal calf serum  
599 to limit cell stress.

600 After cell sorting, samples were deposited on glass coverslips and centrifuged with a  
601 cytopspin at 200 rpm for 10 min. Cells were then fixed in formaldehyde 4% for 10 min. Nucleus  
602 staining was performed with DAPI 1 µg/mL for 1 min and coverslips were mounted on slides  
603 with fluorescent mounting medium (Dako). Cells were observed under a SP8 confocal laser-  
604 scanning microscope equipped with an HCP PL APO 100x/1.44 Oil CORR CS immersion  
605 objective (Leica). Z-stacks were re-sliced horizontally and vertically to obtain the projections  
606 of perpendicular views from 3D images, providing a view of all bacteria in the cells, using Las  
607 AF lite 2.6.3 build 8173 software (Leica).

608

### 609 **Immuno-histochemistry (IHC)**

610 Chick gall bladders were fixed in 4% buffered paraformaldehyde at 4°C for 24 h. They  
611 were then processed by routine methods, paraffin embedded, cut in sections (thickness, 5 µm),  
612 and stained for IHC with HRP detection. All samples were incubated at room temperature. The  
613 primary antibody was an anti-*Salmonella* lipopolysaccharide marker: rabbit anti-*Salmonella*  
614 O:4,5 (1/100 – D. Pasteur). The tissue sections were dewaxed in Histosol (Shandon,

615 Thermoscientific), rehydrated in a decreasing series of ethanol, rinsed and rehydrated in tap  
616 water. Sections were treated with heat-induced epitope retrieval, 10mM Sodium Citrate buffer,  
617 pH 6, 121°C, for 15 min. The tissues were then rinsed in tap water. The endogen peroxidase  
618 was blocked in 1% hydrogen peroxide and methanol for 30 min. Preparations were rinsed in  
619 PBS with 1% skimmed milk and 0.05% Tween 20 (PBSTM), blocked in 20% goat serum - 30%  
620 fetal calf serum - PBS for 20 min. They were then incubated with a primary antibody for 60  
621 min and rinsed in PBSTM, followed by N-Histofine rabbit, HRP (MMFRANCE) for 30 min.  
622 At the end, samples were rinsed in PBSTM, incubated with chromogen (diaminobenzidine,  
623 liquid DAB +, MMFrance) for 5 min, counterstained with hematoxylin of Harris (Merck,  
624 Labellians), rinsed in tap water, dehydrated in successive ethanol baths (50°, 70°, 90° and  
625 absolute, each for 2 min), cleared in histosol, and mounted on coverslips with Eukitt.

626 Tissues were examined and photographed with a light microscope Eclipse 80i, Nikon  
627 with DXM 1200C digital camera (Nikon Instruments, Europe, Amsterdam, Netherlands) and  
628 NIS-Elements D Microscope Imaging Software.

629

### 630 **Statistical analyses**

631 A Kruskal-Wallis Test was conducted to examine the differences in the levels of organ  
632 colonization, followed by a Dunn's multiple comparisons test (GraphPad Prism version 6.07  
633 for Windows, GraphPad Software, La Jolla California USA, [www.graphpad.com](http://www.graphpad.com)). Significance  
634 was \* $p < 0.05$  and \*\* $p < 0.01$ .

635 For the flow cytometric analyses, asymptotic two-sample Fisher-Pitman permutation  
636 tests (One-Way-Test) were performed with R software, package Rcmdr version 2.5.3 (2019-  
637 05-06). Significance was \*  $p < 0.05$  (<http://www.r-project.org>,  
638 <http://socserv.socsci.mcmaster.ca/jfox/Misc/Rcmdr/>).

639

## 640 Acknowledgements

641 We would like to thank Jérôme Trotereau (SPVB, ISP unit, INRAE Val de Loire) who  
642 participated in inoculating the chicks and the staff of the Experimental Platform for Infectious  
643 Diseases of Institut National de Recherche pour l'Agriculture, l'Alimentation et  
644 l'Environnement (PFIE, INRAE Val de Loire) for caring for the chicks and participating in the  
645 experiments, and also P. Quéré (3IMo, ISP unit, INRAE Val de Loire) for her advice on the  
646 labeling of the monocytes-macrophages. We are also grateful to T. Larcher (PANTher APEX,  
647 INRAE – Oniris Nantes) for his advice and technical support.

648

## 649 References

- 650 1. WHO. World Health Organization. Foodborne Disease Burden Epidemiology Reference Group.  
651 2015. WHO estimates of the global burden of foodborne diseases. World Health Organization. 2017.
- 652 2. ECDC Ea. The European Union summary report on trends and sources of zoonoses, zoonotic  
653 agents and food-borne outbreaks in 2016. EFSA Journal. 2019;15(12):5077.
- 654 3. Ferrari RG, Rosario DKA, Cunha-Neto A, Mano SB, Figueiredo EES, Conte-Junior CA. Worldwide  
655 epidemiology of *Salmonella serovars* in animal-based foods: a meta-analysis. Appl Environ Microbiol.  
656 2019;85(14).
- 657 4. Rabinowitz PM, Conti LA. Human-clinical-medicine: clinical approaches to zoonoses, toxicants  
658 and other shared health risks. 1st ed. Saunders Maryland Heights, MD, USA;2009.
- 659 5. Knight-Jones TJ, Mylrea GE, Kahn S. Animal production food safety: priority pathogens for  
660 standard setting by the World Organisation for Animal Health. Rev Sci Tech. 2010;29(3):523-35.
- 661 6. Menanteau P, Kempf F, Trotereau J, Virlogeux-Payant I, Gitton E, Dalifard J, et al. Role of  
662 systemic infection, cross contaminations and super-shedders in *Salmonella* carrier state in chicken.  
663 Environ Microbiol. 2018;20(9):3246-60.
- 664 7. Ly KT, Casanova JE. Mechanisms of *Salmonella* entry into host cells. Cell Microbiol.  
665 2007;9(9):2103-11.
- 666 8. Heffernan EJ, Wu L, Louie J, Okamoto S, Fierer J, Guiney DG. Specificity of the complement  
667 resistance and cell association phenotypes encoded by the outer membrane protein genes *rck* from  
668 *Salmonella* Typhimurium and *ail* from *Yersinia enterocolitica*. Infect Immun. 1994;62(11):5183-6.
- 669 9. Rosselin M, Virlogeux-Payant I, Roy C, Bottreau E, Sizaret PY, Mijouin L, et al. Rck of *Salmonella*  
670 *enterica*, subspecies *enterica* serovar Enteritidis, mediates zipper-like internalization. Cell Res.  
671 2010;20(6):647-64.
- 672 10. Lambert MA, Smith SG. The PagN protein of *Salmonella enterica* serovar Typhimurium is an  
673 adhesin and invasin. BMC Microbiol. 2008;8:142.
- 674 11. Lambert MA, Smith SG. The PagN protein mediates invasion *via* interaction with proteoglycan.  
675 FEMS Microbiol Lett. 2009;297(2):209-16.
- 676 12. Wiedemann A, Mijouin L, Ayoub MA, Barilleau E, Canepa S, Teixeira-Gomes AP, et al.  
677 Identification of the epidermal growth factor receptor as the receptor for *Salmonella* Rck-dependent  
678 invasion. FASEB journal : official publication of the Federation of American Societies for Experimental  
679 Biology. 2016;30(12):4180-91.

- 680 13. Wallis TS, Galyov EE. Molecular basis of *Salmonella*-induced enteritis. *Mol Microbiol.*  
681 2000;36(5):997-1005.
- 682 14. Jneid B, Moreau K, Plaisance M, Rouaix A, Dano J, Simon S. Role of T3SS-1 SipD Protein in  
683 Protecting Mice against Non-typhoidal *Salmonella* Typhimurium. *PLoS Negl Trop Dis.*  
684 2016;10(12):e0005207.
- 685 15. Galan JE, Curtiss R, 3rd. Cloning and molecular characterization of genes whose products allow  
686 *Salmonella* Typhimurium to penetrate tissue culture cells. *PNAS.* 1989;86(16):6383-7.
- 687 16. Murray RA, Lee CA. Invasion genes are not required for *Salmonella enterica* serovar  
688 Typhimurium to breach the intestinal epithelium: evidence that *Salmonella* pathogenicity island 1 has  
689 alternative functions during infection. *Infect Immun.* 2000;68(9):5050-5.
- 690 17. Hapfelmeier S, Stecher B, Barthel M, Kremer M, Muller AJ, Heikenwalder M, et al. The  
691 *Salmonella* pathogenicity island (SPI)-2 and SPI-1 type III secretion systems allow *Salmonella* serovar  
692 Typhimurium to trigger colitis via MyD88-dependent and MyD88-independent mechanisms. *J*  
693 *Immunol.* 2005;174(3):1675-85.
- 694 18. Sivula CP, Bogomolnaya LM, Andrews-Polymenis HL. A comparison of cecal colonization of  
695 *Salmonella enterica* serotype Typhimurium in white leghorn chicks and *Salmonella*-resistant mice.  
696 *BMC Microbiol.* 2008;8:182.
- 697 19. Rychlik I, Karasova D, Sebkova A, Volf J, Sisak F, Havlickova H, et al. Virulence potential of five  
698 major pathogenicity islands (SPI-1 to SPI-5) of *Salmonella enterica* serovar Enteritidis for chickens. *BMC*  
699 *Microbiol.* 2009;9:268.
- 700 20. Desin TS, Lam PK, Koch B, Mickael C, Berberov E, Wisner AL, et al. *Salmonella enterica* serovar  
701 Enteritidis pathogenicity island 1 is not essential for but facilitates rapid systemic spread in chickens.  
702 *Infect Immun.* 2009;77(7):2866-75.
- 703 21. Hu Q, Coburn B, Deng W, Li Y, Shi X, Lan Q, et al. *Salmonella enterica* serovar Senftenberg  
704 human clinical isolates lacking SPI-1. *J Clin Microbiol.* 2008;46(4):1330-6.
- 705 22. Suez J, Porwollik S, Dagan A, Marzel A, Schorr YI, Desai PT, et al. Virulence gene profiling and  
706 pathogenicity characterization of non-typhoidal *Salmonella* accounted for invasive disease in humans.  
707 *PLoS One.* 2013;8(3):e58449.
- 708 23. Conner CP, Heithoff DM, Julio SM, Sinsheimer RL, Mahan MJ. Differential patterns of acquired  
709 virulence genes distinguish *Salmonella* strains. *PNAS.* 1998;95(8):4641-5.
- 710 24. Dyszel JL, Smith JN, Lucas DE, Soares JA, Swearingen MC, Vross MA, et al. *Salmonella enterica*  
711 serovar Typhimurium can detect acyl homoserine lactone production by *Yersinia enterocolitica* in mice.  
712 *J Bacteriol.* 2010;192(1):29-37.
- 713 25. Ghosh S, Chakraborty K, Nagaraja T, Basak S, Koley H, Dutta S, et al. An adhesion protein of  
714 *Salmonella enterica* serovar Typhi is required for pathogenesis and potential target for vaccine  
715 development. *PNAS.* 2011;108(8):3348-53.
- 716 26. Tundup S, Kandasamy M, Perez JT, Mena N, Steel J, Nagy T, et al. Endothelial cell tropism is a  
717 determinant of H5N1 pathogenesis in mammalian species. *PLoS Pathog.* 2017;13(3):e1006270.
- 718 27. Pereira SS, Trindade S, De Niz M, Figueiredo LM. Tissue tropism in parasitic diseases. *Open Biol.*  
719 2019;9:190036.
- 720 28. Miao EA, Mao DP, Yudkovsky N, Bonneau R, Lorang CG, Warren SE, et al. Innate immune  
721 detection of the type III secretion apparatus through the NLRC4 inflammasome. *PNAS.*  
722 2010;107(7):3076-80.
- 723 29. Ryan KJ, Ray CGE. *Sherris Medical Microbiology: an introduction to infectious disease* ( fourth  
724 edition). New York: McGraw-Hill, USA; 2004.
- 725 30. Roche SM, Holbert S, Trotereau J, Schaeffer S, Georgeault S, Virlogeux-Payant I, et al.  
726 *Salmonella* Typhimurium invalidated for the three currently known invasion factors keeps its ability to  
727 invade several cell models. *Front Cell Infect Microbiol.* 2018;8:273.
- 728 31. Gonzalez-Escobedo G, Marshall JM, Gunn JS. Chronic and acute infection of the gall bladder by  
729 *Salmonella* Typhi: understanding the carrier state. *Nat Rev Microbiol.* 2011;9(1):9-14.
- 730 32. Galan JE. *Salmonella* interactions with host cells: type III secretion at work. *Annu Rev Cell Dev*  
731 *Biol.* 2001;17:53-86.

- 732 33. Coburn B, Sekirov I, Finlay BB. Type III secretion systems and disease. *Clin Microbiol Rev.*  
733 2007;20(4):535-49.
- 734 34. McGhie EJ, Brawn LC, Hume PJ, Humphreys D, Koronakis V. *Salmonella* takes control: effector-  
735 driven manipulation of the host. *Curr Opin Microbiol.* 2009;12(1):117-24.
- 736 35. Jones MA, Hulme SD, Barrow PA, Wigley P. The *Salmonella* pathogenicity island 1 and  
737 *Salmonella* pathogenicity island 2 type III secretion systems play a major role in pathogenesis of  
738 systemic disease and gastrointestinal tract colonization of *Salmonella enterica* serovar Typhimurium  
739 in the chicken. *Avian Pathol.* 2007;36(3):199-203.
- 740 36. Pavlova B, Volf J, Ondrackova P, Matiasovic J, Stepanova H, Crhanova M, et al. SPI-1-encoded  
741 type III secretion system of *Salmonella enterica* is required for the suppression of porcine alveolar  
742 macrophage cytokine expression. *Vet Res.* 2011;42:16.
- 743 37. Sekirov I, Gill N, Jogova M, Tam N, Robertson M, de Llanos R, et al. *Salmonella* SPI-1-mediated  
744 neutrophil recruitment during enteric colitis is associated with reduction and alteration in intestinal  
745 microbiota. *Gut microbes.* 2010;1(1):30-41.
- 746 38. Zhao X, Tang X, Guo N, An Y, Chen X, Shi C, et al. Biochanin a enhances the defense against  
747 *Salmonella enterica* infection through AMPK/ULK1/mTOR-mediated autophagy and extracellular traps  
748 and reversing SPI-1-dependent macrophage (MPhi) M2 polarization. *Front Cell Infect Microbiol.*  
749 2018;8:318.
- 750 39. Lou L, Zhang P, Piao R, Wang Y. *Salmonella* Pathogenicity Island 1 (SPI-1) and its complex  
751 regulatory network. *Front Cell Infect Microbiol.* 2019;9:270.
- 752 40. Elsheimer-Matulova M, Varmuzova K, Kyrova K, Havlickova H, Sisak F, Rahman M, et al. *phoP*,  
753 SPI1, SPI2 and *aroA* mutants of *Salmonella* Enteritidis induce a different immune response in chickens.  
754 *Vet Res.* 2015;46:96.
- 755 41. Richter-Dahlfors A, Buchan AM, Finlay BB. Murine salmonellosis studied by confocal  
756 microscopy: *Salmonella* Typhimurium resides intracellularly inside macrophages and exerts a cytotoxic  
757 effect on phagocytes *in vivo*. *J Exp Med.* 1997;186(4):569-80.
- 758 42. Salcedo SP, Noursadeghi M, Cohen J, Holden DW. Intracellular replication of *Salmonella*  
759 Typhimurium strains in specific subsets of splenic macrophages *in vivo*. *Cell Microbiol.* 2001;3(9):587-  
760 97.
- 761 43. Sheppard M, Webb C, Heath F, Mallows V, Emilianus R, Maskell D, et al. Dynamics of bacterial  
762 growth and distribution within the liver during *Salmonella* infection. *Cell Microbiol.* 2003;5(9):593-600.
- 763 44. Geddes K, Cruz F, Heffron F. Analysis of cells targeted by *Salmonella* type III secretion *in vivo*.  
764 *PLoS Pathog.* 2007;3(12):e196.
- 765 45. Thone F, Schwanhauser B, Becker D, Ballmaier M, Bumann D. FACS-isolation of *Salmonella*-  
766 infected cells with defined bacterial load from mouse spleen. *J Microbiol Methods.* 2007;71(3):220-4.
- 767 46. Watson KG, Holden DW. Dynamics of growth and dissemination of *Salmonella in vivo*. *Cell*  
768 *Microbiol.* 2010;12(10):1389-97.
- 769 47. Mastroeni P, Grant A, Restif O, Maskell D. A dynamic view of the spread and intracellular  
770 distribution of *Salmonella enterica*. *Nat Rev Microbiol.* 2009;7(1):73-80.
- 771 48. Jeurissen SH. Structure and function of the chicken spleen. *Res Immunol.* 1991;142(4):352-5.
- 772 49. Fields PI, Swanson RV, Haidaris CG, Heffron F. Mutants of *Salmonella* Typhimurium that cannot  
773 survive within the macrophage are avirulent. *PNAS.* 1986;83(14):5189-93.
- 774 50. Zaefarian F, Abdollahi MR, Cowieson A, Ravindran V. Avian Liver: The Forgotten Organ. *Animals*  
775 *(Basel).* 2019;9(2).
- 776 51. Hu T, Wu Z, Bush SJ, Freem L, Vervelde L, Summers KM, et al. Characterization of  
777 subpopulations of chicken mononuclear phagocytes that express TIM4 and CSF1R. *J Immunol.*  
778 2019;202(4):1186-99.
- 779 52. Mehal WZ, Azzaroli F, Crispe IN. Immunology of the healthy liver: old questions and new  
780 insights. *Gastroenterology.* 2001;120(1):250-60.
- 781 53. Wang Y, Zhang C. The roles of liver-resident lymphocytes in liver diseases. *Front Immunol.*  
782 2019;10:1582.

- 783 54. Erdogan S. The branching of the aortic arch in the Eurasian bittern (*Botaurus stellaris*, Linnaeus  
784 1758). *Vet Med*. 2012;57(5):239-44.
- 785 55. Tucker WD, Arora Y, Mahajan K. Anatomy, Blood Vessels. In: StatPearls (Internet). Treasure  
786 Island (FL): StatPearls Publishing2020, PMID: 2922226.
- 787 56. Iqbal J, Bhutto AL, Shah MG, Lochi GM, Hayat S, Ali N, et al. Gross anatomical and histological  
788 studies on the liver of broiler. *J Appl Environ Biol Sci*. 2014;4(12):284-95.
- 789 57. Crawford RW, Rosales-Reyes R, Ramirez-Aguilar Mde L, Chapa-Azuela O, Alpuche-Aranda C,  
790 Gunn JS. Gallstones play a significant role in *Salmonella spp.* gallbladder colonization and carriage.  
791 *PNAS*. 2010;107(9):4353-8.
- 792 58. Di Domenico EG, Cavallo I, Pontone M, Toma L, Ensoli F. Biofilm producing *Salmonella* Typhi:  
793 chronic colonization and development of gallbladder cancer. *Int J Mol Sci*. 2017;18(9).
- 794 59. Menendez A, Arena ET, Guttman JA, Thorson L, Vallance BA, Vogl W, et al. *Salmonella* infection  
795 of gallbladder epithelial cells drives local inflammation and injury in a model of acute typhoid fever. *J*  
796 *Infect Dis*. 2009;200(11):1703-13.
- 797 60. Gunn JS, Marshall JM, Baker S, Dongol S, Charles RC, Ryan ET. *Salmonella* chronic carriage:  
798 epidemiology, diagnosis, and gallbladder persistence. *Trends Microbiol*. 2014;22(11):648-55.
- 799 61. Scanu T, Spaapen RM, Bakker JM, Pratap CB, Wu LE, Hofland I, et al. *Salmonella* manipulation  
800 of host signaling pathways provokes cellular transformation associated with gallbladder carcinoma.  
801 *Cell Host Microbe*. 2015;17(6):763-74.
- 802 62. Lavergne GM, James HF, Martineau C, Diena BB, Lior H. The guinea pig as a model for the  
803 asymptomatic human typhoid carrier. *Lab Anim Sci*. 1977;27(5 Pt 2):806-16.
- 804 63. Gonzalez-Escobedo G, Gunn JS. Gallbladder epithelium as a niche for chronic *Salmonella*  
805 carriage. *Infect Immun*. 2013;81(8):2920-30.
- 806 64. van Dijk A, Tersteeg-Zijderfeld MH, Tjeerdsma-van Bokhoven JL, Jansman AJ, Veldhuizen EJ,  
807 Haagsman HP. Chicken heterophils are recruited to the site of *Salmonella* infection and release  
808 antibacterial mature Cathelicidin-2 upon stimulation with LPS. *Mol Immunol*. 2009;46(7):1517-26.
- 809 65. Aiastrui A, Pucciarelli MG, Garcia-del Portillo F. *Salmonella enterica* serovar Typhimurium  
810 invades fibroblasts by multiple routes differing from the entry into epithelial cells. *Infect Immun*.  
811 2010;78(6):2700-13.
- 812 66. Valdivia RH, Falkow S. Bacterial genetics by flow cytometry: rapid isolation of *Salmonella*  
813 Typhimurium acid-inducible promoters by differential fluorescence induction. *Mol Microbiol*.  
814 1996;22(2):367-78.
- 815 67. Casadaban MJ, Cohen SN. Analysis of gene control signals by DNA fusion and cloning in  
816 *Escherichia coli*. *J Mol Biol*. 1980;138(2):179-207.
- 817 68. Mast J, Goddeeris BM, Peeters K, Vandesande F, Berghman LR. Characterisation of chicken  
818 monocytes, macrophages and interdigitating cells by the monoclonal antibody KUL01. *Vet Immunol*  
819 *Immunopathol*. 1998;61(2-4):343-57.
- 820 69. Chen CL, Ager LL, Gartland GL, Cooper MD. Identification of a T3/T cell receptor complex in  
821 chickens. *J Exp Med*. 1986;164(1):375-80.
- 822 70. Rothwell CJ, Vervelde, L., Davison, T.F. Identification of Bu-1 alloantigens using the monoclonal  
823 antibody AV20. 1996. In: *Poultry Immunology* [Internet]. Carfax, Abindon, UK.
- 824 71. Lacoste-Eleau AS, Bleux C, Quere P, Coudert F, Corbel C, Kanellopoulos-Langevin C.  
825 Biochemical and functional characterization of an avian homolog of the integrin GPIIb-IIIa present on  
826 chicken thrombocytes. *Exp Cell Res*. 1994;213(1):198-209.
- 827 72. Gallin WJ, Edelman GM, Cunningham BA. Characterization of L-CAM, a major cell adhesion  
828 molecule from embryonic liver cells. *PNAS*. 1983;80(4):1038-42.

829

830

831 **Figure legends**

832 **Fig 1. Level of different *S. Typhimurium* strains in organs of chicks after intra-**  
833 **peritoneal inoculation**

834 Five-day-old chicks were intraperitoneally inoculated with around  $6.10^7$  CFU/chick  
835 with *S. Typhimurium* 14028 turboFP650 wild-type strain (WT  ),  $\Delta invA::kan$  mutant  
836 strain ( $\Delta invA$ ; T3SS-1 defective  ) or the  $\Delta invA::kan \Delta pagN::cm \Delta rck$  mutant strain  
837 (3 $\Delta$ ; T3SS-1, Rck, PagN defective  ). Two days post-infection, spleens, livers, aortic  
838 vessels and gall bladders were removed aseptically from each animal for quantification of  
839 bacterial load. Results are expressed as number of bacteria per g of organ (log CFU per g of  
840 organ). The medians are represented by a red dash. A Kruskal-Wallis Test was conducted,  
841 followed by Dunn's multiple comparisons test (GraphPad Software). Significance was \* $p <$   
842 0.05 and \*\* $p <$  0.01.

843

844 **Fig 2. Intracellular localization of *Salmonella* in cells purified from *in vivo* infected organs**

845 Five-day-old chicks were intraperitoneally inoculated with around  $6.10^7$  CFU/chick  
846 with *S. Typhimurium* 14028 turboFP650 wild-type strain (WT  ),  $\Delta invA::kan$  mutant  
847 strain ( $\Delta invA$ ; T3SS-1 defective  ) or the  $\Delta invA::kan \Delta pagN::cm \Delta rck$  mutant strain  
848 (3 $\Delta$ ; T3SS-1, Rck, PagN defective  ). Two days post infection, animals were sacrificed  
849 and the different organs removed. After, cells were isolated from organs, they were sorted using  
850 a high-speed cell sorter, MoFlo Astrios EQ and deposited on glass coverslips after cytopsin at  
851 200 rpm for 10 min. Cells were then fixed in formaldehyde. Nucleus staining was performed  
852 with Dapi (blue). The bacteria are in red (turboFP650), whereas cells are identified in green  
853 thanks to FITC or Alexa Fluor<sup>TM</sup> 488 conjugated antibodies. Cells were observed under a SP8  
854 confocal laser-scanning microscope equipped with a 100x oil immersion objective (Leica). Z-  
855 stacks were re-sliced horizontally and vertically to obtain the projections of perpendicular views

856 from 3D images, allowing a view of all bacteria in the cells, using Las AF lite 2.6.3 build 8173  
857 software (Leica). White dashes represent 20  $\mu\text{m}$ . **A** represents endothelial cells from the aortic  
858 vessels, infected with the 3 $\Delta$  strain. Picture size 32.54  $\mu\text{m}$  x 38.45  $\mu\text{m}$ . **B** represents monocytes-  
859 macrophages from the liver, infected with the  $\Delta invA$  strain. Picture size 116.25  $\mu\text{m}$  x 116.25  
860  $\mu\text{m}$ . **C** represents B lymphocytes, infected with the wild-type strain. Picture size 58.13  $\mu\text{m}$  x  
861 58.13  $\mu\text{m}$ . **D** represents T lymphocytes, infected with the wild-type strain. Picture size 39.88  
862  $\mu\text{m}$  x 39.88  $\mu\text{m}$ . **E** represents epithelial cells in the gall bladder, infected with the 3 $\Delta$  strain.  
863 Picture size 37.80  $\mu\text{m}$  x 37.80  $\mu\text{m}$ . **F** represents thrombocytes in the aortic vessels, infected  
864 with the 3 $\Delta$  strain. Picture size 116.25  $\mu\text{m}$  x 116.25  $\mu\text{m}$ .

865

### 866 **Fig 3. Percentage of identified and *Salmonella* infected cells in spleen**

867 Five-day-old chicks were intraperitoneally inoculated with around  $6.10^7$  CFU/chick  
868 with *S. Typhimurium* 14028 turboFP650 wild-type strain (WT  ),  $\Delta invA::kan$  mutant  
869 strain ( $\Delta invA$ ; T3SS-1 defective  ) or the  $\Delta invA::kan \Delta pagN::cm \Delta rck$  mutant strain  
870 (3 $\Delta$ ; T3SS-1, Rck, PagN defective  ). Two days post infection, animals were sacrificed  
871 and the different organs removed. Cells from uninfected animals of the same age were used as  
872 a control. After labeling with the corresponding antibodies, the percentages of macrophages-  
873 monocytes, B and T lymphocytes, thrombocytes and epithelial and endothelial cells were  
874 quantified by flow-cytometry. The percentage of labeled cells (A) and the percentage of labeled  
875 infected cells (B) are represented. All negative responses were scored at 0.001%. The medians  
876 are represented by a red dash. Asymptotic two-sample Fisher-Pitman permutation tests (One-  
877 Way-Test) were performed (R software). Significance was \*  $p < 0.05$ .

878

### 879 **Fig 4. Percentage of identified and *Salmonella* infected cells in liver**



880 Five-day-old chicks were intraperitoneally inoculated with around  $6.10^7$  CFU/chick  
881 with *S. Typhimurium* 14028 turboFP650 wild-type strain (WT  ),  $\Delta invA::kan$  mutant  
882 strain ( $\Delta invA$ ; T3SS-1 defective  ) or the  $\Delta invA::kan \Delta pagN::cm \Delta rck$  mutant strain  
883 (3 $\Delta$ ; T3SS-1, Rck, PagN defective  ). Two days post infection, animals were sacrificed  
884 and the different organs removed. Cells from uninfected animals of the same age were used as  
885 a control. After labeling with the corresponding antibodies, the percentages of macrophages-  
886 monocytes, B and T lymphocytes, thrombocytes and epithelial and endothelial cells were  
887 quantified by flow-cytometry. The percentage of labeled cells (A) and the percentage of labeled  
888 infected cells (B) are represented. All negative responses were scored at 0.001%. The medians  
889 are represented by a red dash. Asymptotic two-sample Fisher-Pitman permutation tests (One-  
890 Way-Test) were performed (R software). Significance was \*  $p < 0.05$ .

891

## 892 **Fig 5. Percentage of identified and *Salmonella* infected cells in aortic vessels**

893 Five-day-old chicks were intraperitoneally inoculated with around  $6.10^7$  CFU/chick  
894 with *S. Typhimurium* 14028 turboFP650 wild-type strain (WT  ),  $\Delta invA::kan$  mutant  
895 strain ( $\Delta invA$ ; T3SS-1 defective  ) or the  $\Delta invA::kan \Delta pagN::cm \Delta rck$  mutant strain  
896 (3 $\Delta$ ; T3SS-1, Rck, PagN defective  ). Two days post infection, animals were  
897 sacrificed and the different organs removed. Cells from uninfected animals of the same age  
898 were used as a control. After labeling with the corresponding antibodies, the percentages of  
899 macrophages-monocytes, B and T lymphocytes, thrombocytes and epithelial and endothelial  
900 cells were quantified by flow-cytometry. The percentage of labeled cells (A) and the percentage  
901 of labeled infected cells (B) are represented. All negative responses were scored at 0.001%. The  
902 medians are represented by a red dash. Asymptotic two-sample Fisher-Pitman permutation tests  
903 (One-Way-Test) were performed (R software). Significance was \*  $p < 0.05$ .

904

905 **Fig 6. Percentage of identified and *Salmonella* infected cells in gall bladder**

906 Five-day-old chicks were intraperitoneally inoculated with around  $6.10^7$  CFU/chick  
907 with *S. Typhimurium* 14028 turboFP650 wild-type strain (WT  ),  $\Delta invA::kan$  mutant  
908 strain ( $\Delta invA$ ; T3SS-1 defective  ) or the  $\Delta invA::kan \Delta pagN::cm \Delta rck$  mutant strain  
909 ( $3\Delta$ ; T3SS-1, Rck, PagN defective  ). Two days post infection, animals were  
910 sacrificed and the different organs removed. Cells from uninfected animals of the same age  
911 were used as a control. After labeling with the corresponding antibodies, the percentages of  
912 macrophages-monocytes, B and T lymphocytes, thrombocytes and epithelial and endothelial  
913 cells were quantified by flow-cytometry. The percentage of labeled cells (A) and the percentage  
914 of labeled infected cells (B) are represented. All negative responses were scored at 0.001%. The  
915 medians are represented by a red dash. Asymptotic two-sample Fisher-Pitman permutation tests  
916 (One-Way-Test) were performed (R software). Significance was \*  $p < 0.05$ .

917

918 **Fig 7. Immunohisto-chemistry of chick gall bladder infected with *S. Typhimurium* wild-**  
919 **type stain or with a mutant deleted of the three known invasion factors**

920 Five-day-old chicks were intraperitoneally inoculated with around  $6.10^7$  CFU/chick  
921 with *S. Typhimurium* 14028 turboFP650 wild-type strain (WT) or the  $\Delta invA::kan \Delta pagN::cm$   
922  $\Delta rck$  mutant strain ( $3\Delta$ ). Two days post infection, animals were sacrificed. Gall bladders were  
923 removed and fixed in 4% buffered paraformaldehyde at 4°C for 24 h. Tissues were processed  
924 using routine methods, paraffin embedded, cut in sections (thickness, 5  $\mu$ m), and stained with  
925 diaminobenzidine for IHC with HRP detection. The primary antibody was a rabbit anti-  
926 *Salmonella* O:4,5 lipopolysaccharide marker. Tissues were examined and photographed with a  
927 light microscope Eclipse 80i, Nikon with DXM 1200C digital camera (Nikon Instruments,  
928 Europe, Amsterdam, Netherlands) and NIS-Elements D Microscope Imaging Software. Tissues  
929 were counterstained in blue with Harris' hematoxylin of and *Salmonella* were stained in brown

930 with HRP detection. Representative pictures are presented. Bacteria are seen (  $\blacktriangleright$  ) within the  
931 epithelium (e) and the mucosa (ma). Sections of a gall bladder of (A) an uninfected chick, (B,  
932 D and E) a chick infected by the wild-type strain, (C and F) a chick infected by the  $3\Delta$  mutant  
933 are represented.

934

935 **Fig 8. Persistence of *S. Typhimurium* in the spleen and in the gall bladder after**  
936 **intraperitoneal inoculation**

937 Five-day-old chicks were intraperitoneally inoculated with around  $3.10^7$  CFU/chick  
938 with *S. Typhimurium* 14028 turboFP650 wild-type (WT  ),  $\Delta invA::kan$  mutant strain  
939 ( $\Delta invA$ ; T3SS-1 defective  ) or the  $\Delta invA::kan \Delta pagN::cm \Delta rck$  mutant strain ( $3\Delta$ ;  
940 T3SS-1, Rck, PagN defective  ). Each week, seven animals were sacrificed and their  
941 spleens and gall bladders removed. The kinetics of spleen (A) and gall bladder (B) colonization  
942 were followed each week for a period of 36 days. Results are expressed as number of bacteria  
943 (log CFU per g of organ). The medians are represented by a red dash. A Kruskal-Wallis test  
944 was conducted, followed by a Dunn's multiple comparisons test (GraphPad Software).  
945 Significance was \* $p < 0.05$ .

946

947 **S1 Fig. Identification of labeled and infected labeled monocytes-macrophages using flow-**  
948 **cytometry**

949 The antibody allowing identification of monocytes-macrophages required a secondary  
950 Alexa Fluor<sup>TM</sup> 488 conjugated anti-mouse antibody. Flow cytometric analyses were performed  
951 with a BD LSR Fortessa<sup>TM</sup> X-20 (BD Biosciences, San Jose, CA, USA). BD FACSDiva<sup>TM</sup>  
952 software (v 8.0.2) was used to analyze the cytometric data. For each sample, dot plots were  
953 analyzed. Debris was removed on the basis of morphological criteria, regions were defined on  
954 the basis of uninfected control samples and isotype-control staining. The intensity of green

955 fluorescence (Alexa Fluor™ 488) was on the vertical axis, plotted against the intensity of red  
956 fluorescence (TurboFP650) on the horizontal axis. Labeled cells emitting a green fluorescence  
957 were detected in the upper part of the graph. Infected labeled cells emitting both types of  
958 fluorescence (green and red) were revealed by dots in the upper right-hand part of the graph.  
959 Unlabeled infected cells could also be seen in the lower right-hand part of the graph. Results  
960 were expressed as a percentage. Some examples are presented. Staining in the gall bladder is  
961 shown for the monocytes-macrophages.

962

### 963 **S2 Fig. Identification of labeled and infected labeled thrombocytes using flow-cytometry**

964 The antibody allowing identification of thrombocytes required a secondary Alexa  
965 Fluor™ 488 conjugated anti-mouse antibody. Flow cytometric analyses were performed with a  
966 BD LSR Fortessa™ X-20 (BD Biosciences, San Jose, CA, USA). BD FACSDiva™ software  
967 (v 8.0.2) was used to analyze the cytometric data. For each sample, dot plots were analyzed.  
968 Debris was eliminated on the basis of morphological criteria, regions were set according to  
969 uninfected control samples and isotype-control staining. The intensity of green fluorescence  
970 (Alexa Fluor™ 488) is on the vertical axis, plotted against the intensity of red fluorescence  
971 (TurboFP650) on the horizontal axis. Labeled cells emitting a green fluorescence were detected  
972 in the upper part of the graph. Infected labeled cells emitting both types of fluorescence (green  
973 and red) were revealed by dots in the upper right-hand part of the graph. Unlabeled infected  
974 cells could also be seen in the lower right-hand part of the graph. Results were expressed as a  
975 percentage. Some examples are presented. Staining in the gall bladder is shown for the  
976 thrombocytes.

977

### 978 **S3 Fig. Identification of labeled and infected labeled monocytes-macrophages using flow-** 979 **cytometry**

980 The anti-Bu antibody, that allows B lymphocytes identification, was FITC conjugated.  
981 Flow cytometric analyses were performed with a BD LSR Fortessa™ X-20 (BD Biosciences,  
982 San Jose, CA, USA). BD FACSDiva™ software (v 8.0.2) was used to analyze the cytometric  
983 data. For each sample, dot plots were analyzed. Debris was eliminated on the basis of  
984 morphological criteria, regions were set according to uninfected control samples and isotype-  
985 control staining. The intensity of green fluorescence (FITC) is on the vertical axis, plotted  
986 against the intensity of red fluorescence (TurboFP650) on the horizontal axis. Labeled cells  
987 emitting a green fluorescence were detected in the upper part of the graph. Infected labeled cells  
988 emitting both types of fluorescence (green and red) were revealed by dots in the upper right-  
989 hand part of the graph. Unlabeled infected cells could also be seen in the lower right-hand part  
990 of the graph. Results are expressed as percentages. Some examples are presented. Staining in  
991 the spleen is shown for the B lymphocytes.

992

993 **S4 Fig. Identification of labeled and infected labeled T lymphocytes using flow-cytometry**

994 The anti-CD3 antibody, that allows T lymphocytes identification, was conjugated with  
995 FITC. Flow cytometric analyses were performed with a BD LSR Fortessa™ X-20 (BD  
996 Biosciences, San Jose, CA, USA). BD FACSDiva™ software (v 8.0.2) was used to analyze the  
997 cytometric data. For each sample, dot plots were analyzed. Debris was eliminated on the basis  
998 of morphological criteria, regions were set according to uninfected control samples and isotype-  
999 control staining. The intensity of green fluorescence (FITC) is on the vertical axis, plotted  
1000 against the intensity of red fluorescence (TurboFP650) on the horizontal axis. Labeled cells  
1001 emitting a green fluorescence were detected in the upper part of the graph. Infected labeled  
1002 cells emitting both types of fluorescence (green and red) were revealed by dots in the upper  
1003 right-hand part of the graph. Unlabeled infected cells could also be seen in the lower right-hand

1004 part of the graph. Results are expressed as percentages. Some examples are presented. Staining  
1005 in the spleen is shown for the T lymphocytes.

1006

1007 **S5 Fig. Identification of labeled and infected labeled epithelial cells using flow-cytometry**

1008 The antibody allowing identification of epithelial cells required a secondary Alexa  
1009 Fluor™ 488 conjugated anti-mouse antibody. Flow cytometric analyses were performed with a  
1010 BD LSR Fortessa™ X-20 (BD Biosciences, San Jose, CA, USA). BD FACSDiva™ software  
1011 (v 8.0.2) was used to analyze the cytometric data. For each sample, dot plots were analyzed.  
1012 Debris was eliminated on the basis of morphological criteria, regions were set according to  
1013 uninfected control samples and isotype-control staining. The intensity of green fluorescence  
1014 (Alexa Fluor™ 488) is on the vertical axis, plotted against the intensity of red fluorescence  
1015 (TurboFP650) on the horizontal axis. Labeled cells emitting a green fluorescence were detected  
1016 in the upper part of the graph. Infected labeled cells emitting both types of fluorescence (green  
1017 and red) were revealed by dots in the upper right-hand part of the graph. Unlabeled infected  
1018 cells could also be seen in the lower right-hand part of the graph. Results are expressed as  
1019 percentages. Some examples are presented. Staining in the liver is shown for epithelial cells.

1020

1021 **S6 Fig. Identification of labeled and infected labeled endothelial cells using flow-**  
1022 **cytometry**

1023 The antibody allowing identification of endothelial cells required a secondary Alexa  
1024 Fluor™ 488 conjugated anti-rabbit antibody. Flow cytometric analyses were performed with a  
1025 BD LSR Fortessa™ X-20 (BD Biosciences, San Jose, CA, USA). BD FACSDiva™ software  
1026 (v 8.0.2) was used to analyze the cytometric data. For each sample, dot plots were analyzed.  
1027 Debris was eliminated on the basis of morphological criteria, regions were set according to  
1028 uninfected control samples and isotype-control staining. The intensity of green fluorescence  
1029 (Alexa Fluor™ 488) is on the vertical axis, plotted against the intensity of red fluorescence

1030 (TurboFP650) on the horizontal axis. Labeled cells emitting a green fluorescence were detected  
1031 in the upper part of the graph. Infected labeled cells emitting both types of fluorescence (green  
1032 and red) were revealed by dots in the upper right-hand part of the graph. Unlabeled infected  
1033 cells could also be seen in the lower right-hand part of the graph. Results are expressed as  
1034 percentages. Some examples are presented. Staining in the aortic vessels is shown for  
1035 endothelial cells.

1036

Fig 1. Experimental infection of chicks by *Salmonella*

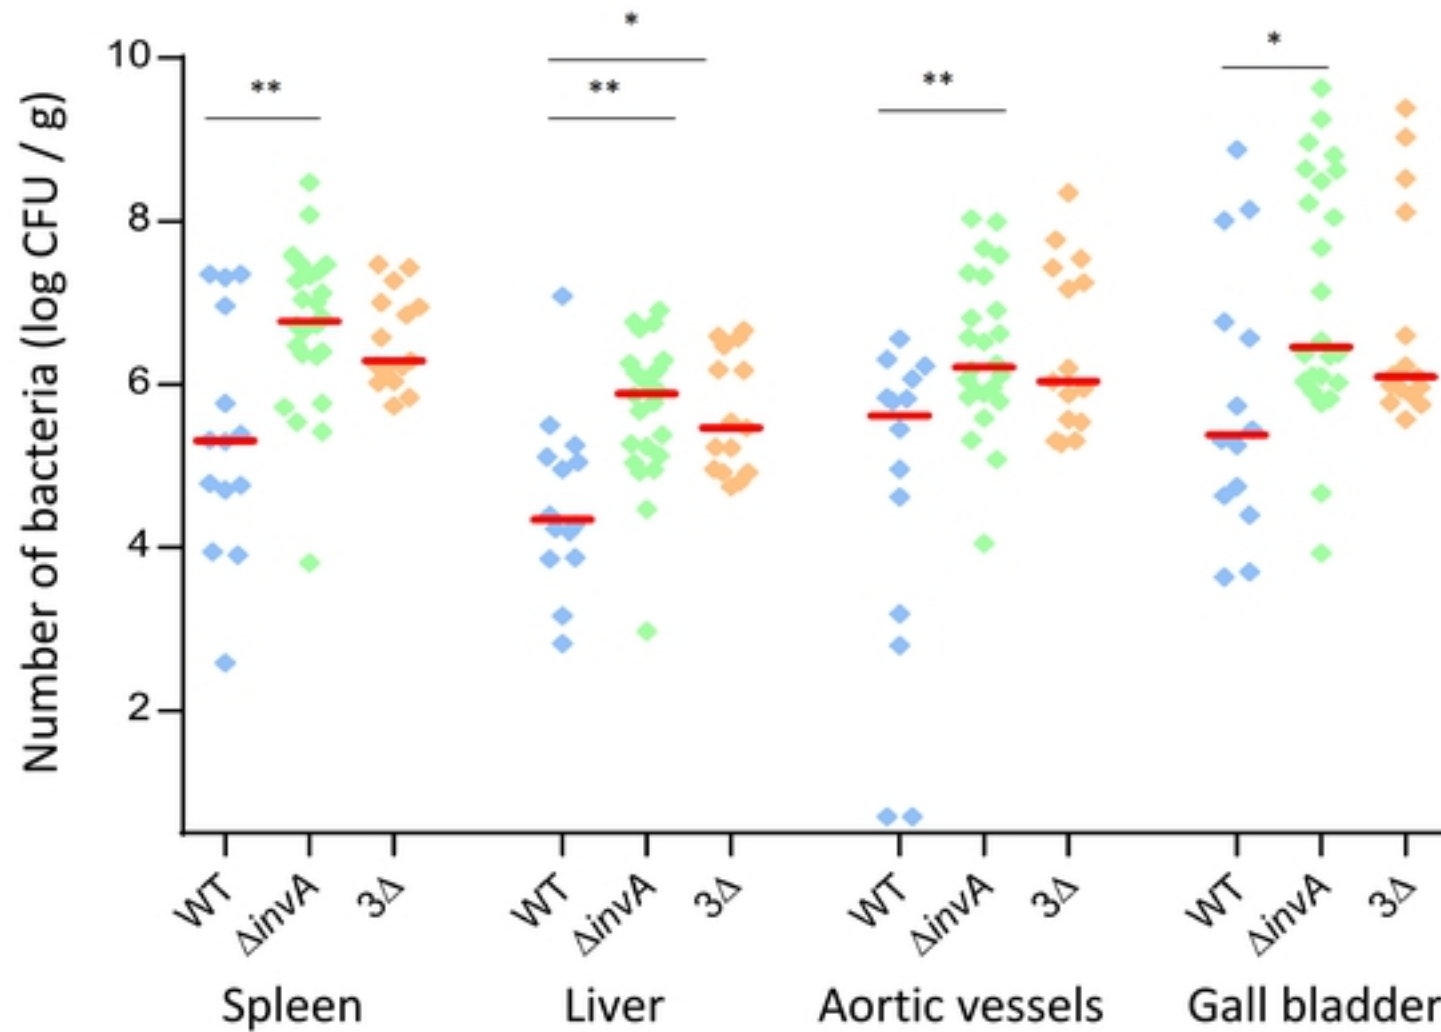

Figure 1



Fig. 2

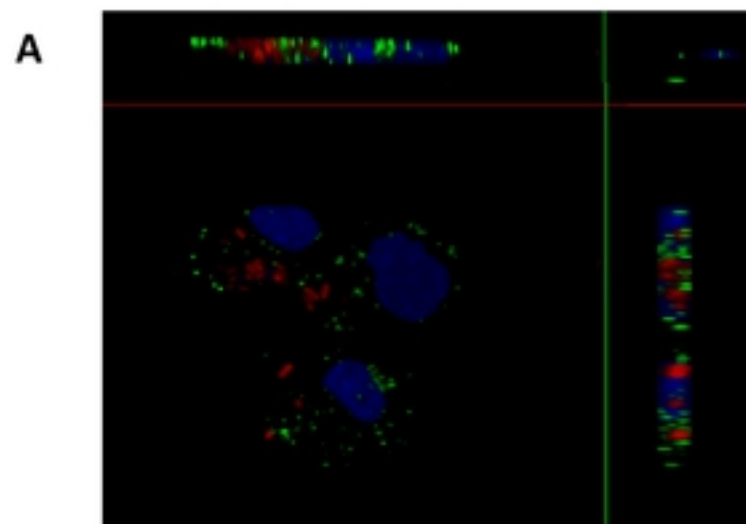

Endothelial cells

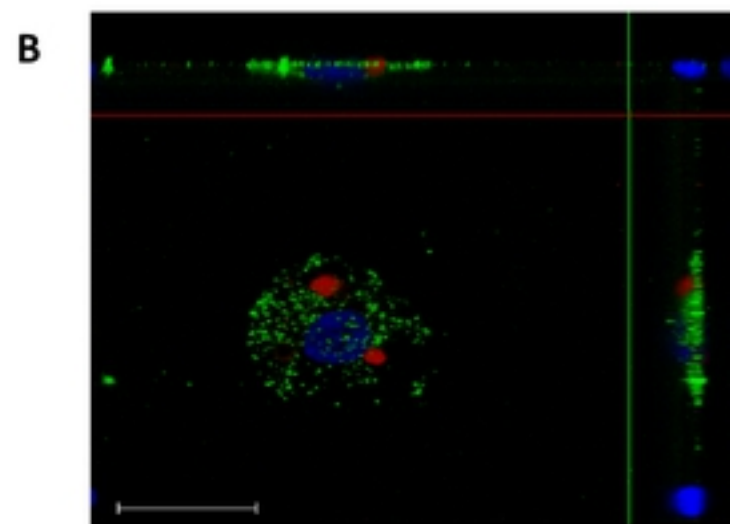

Monocytes-macrophages

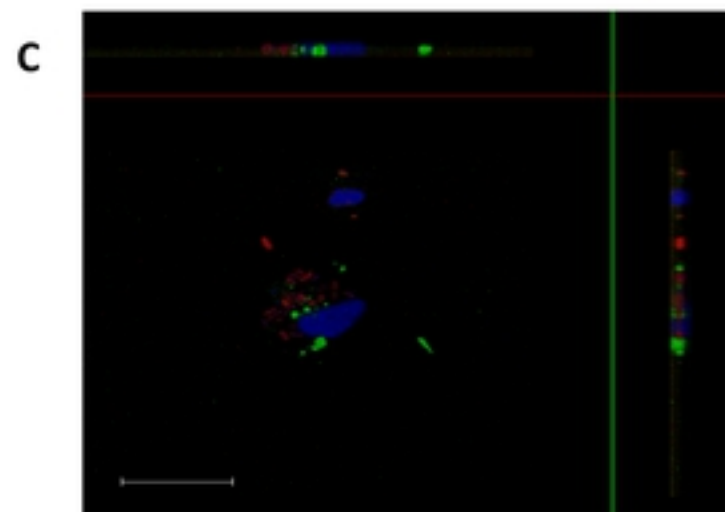

B lymphocytes

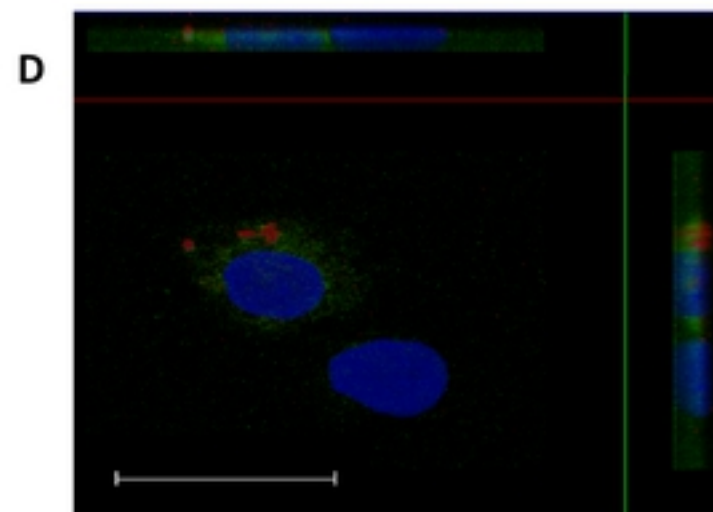

T lymphocytes

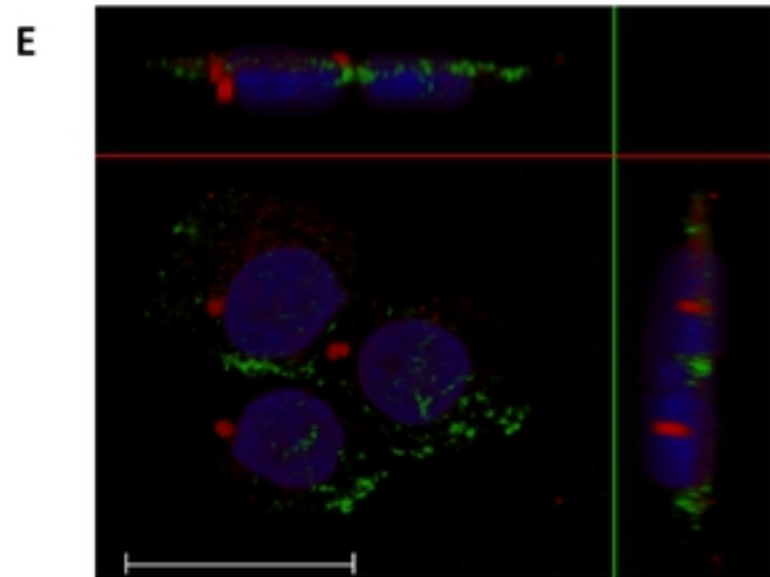

Epithelial cells

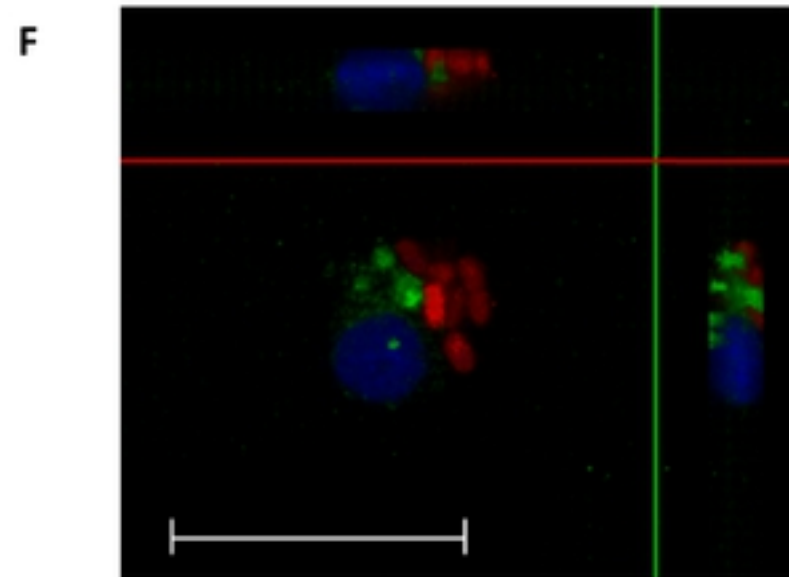

Thrombocytes

Fig 3. Cell types and *Salmonella* infected cells

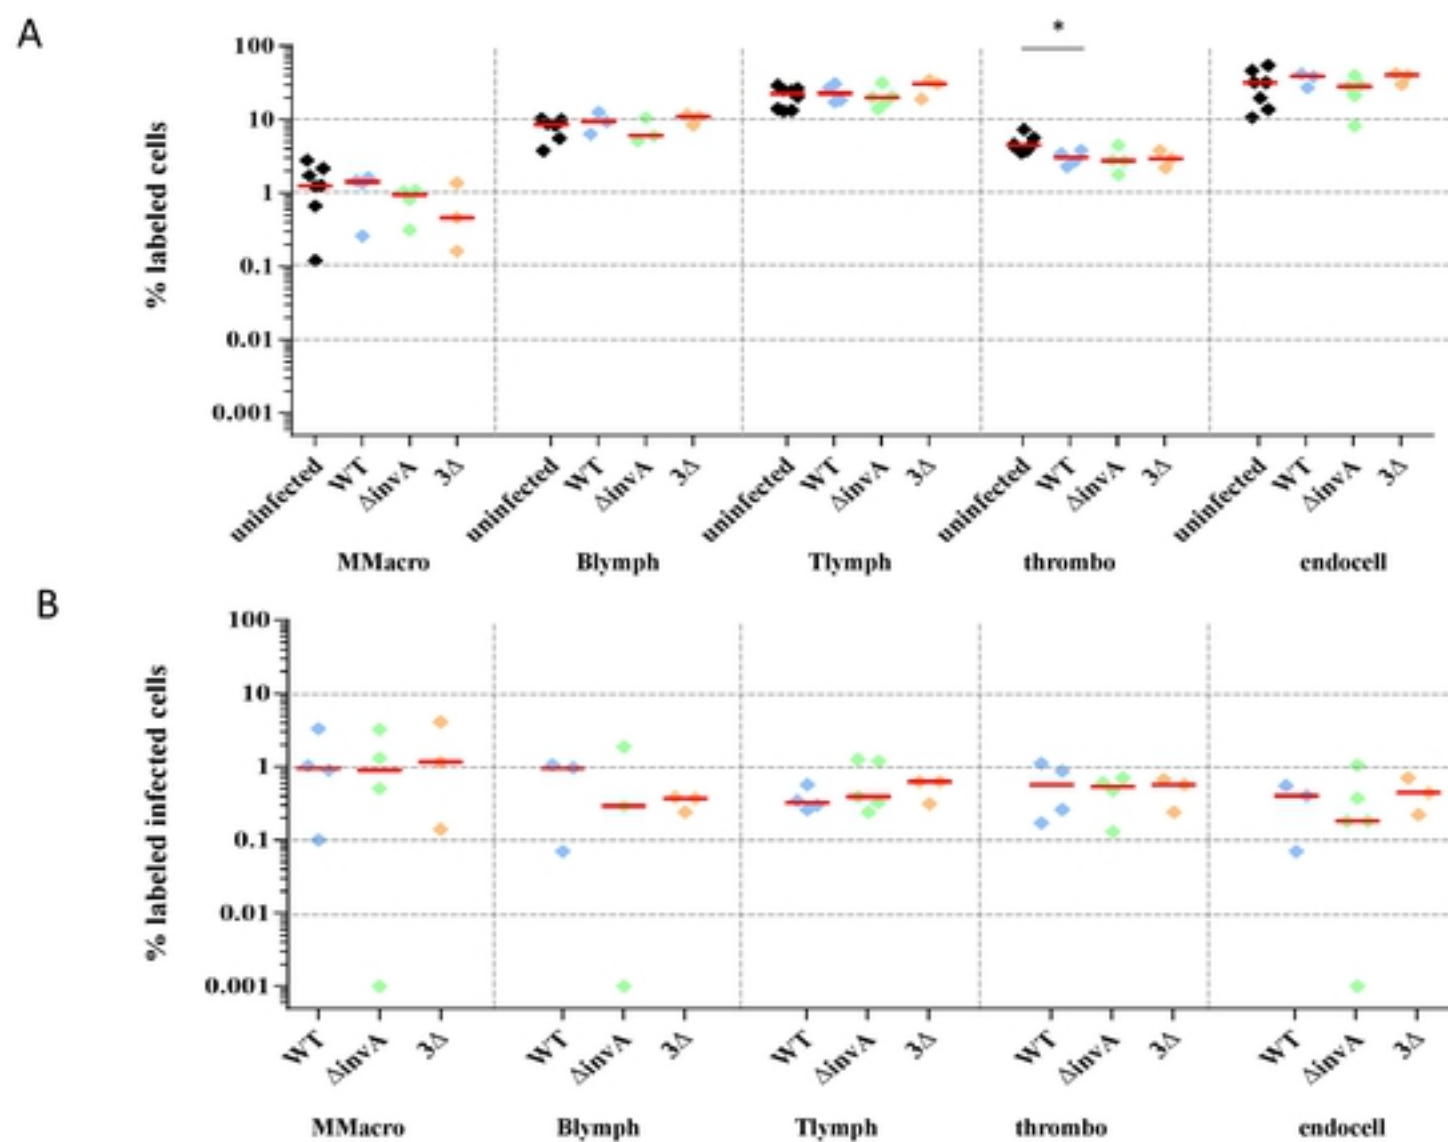

Figure 3

Fig 4. Cell types and *Salmonella* infected cells

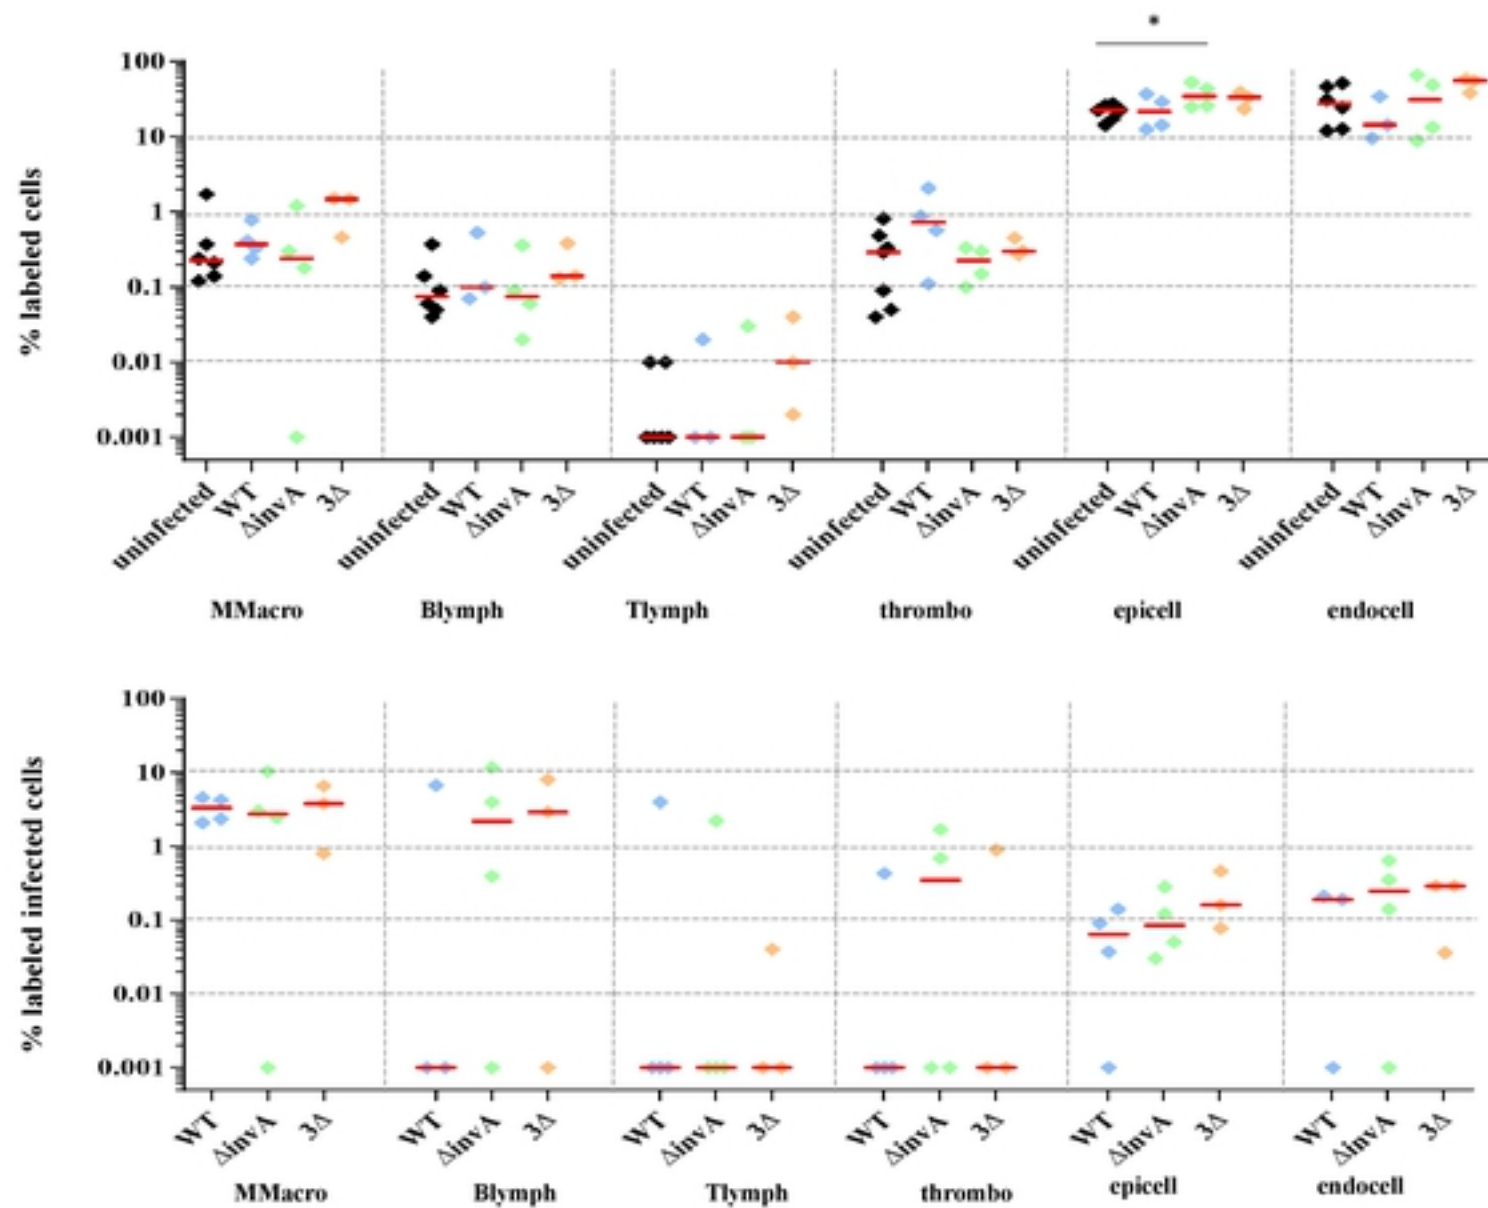

Figure 4

Fig 5. Cell types and *Salmonella* infected cells

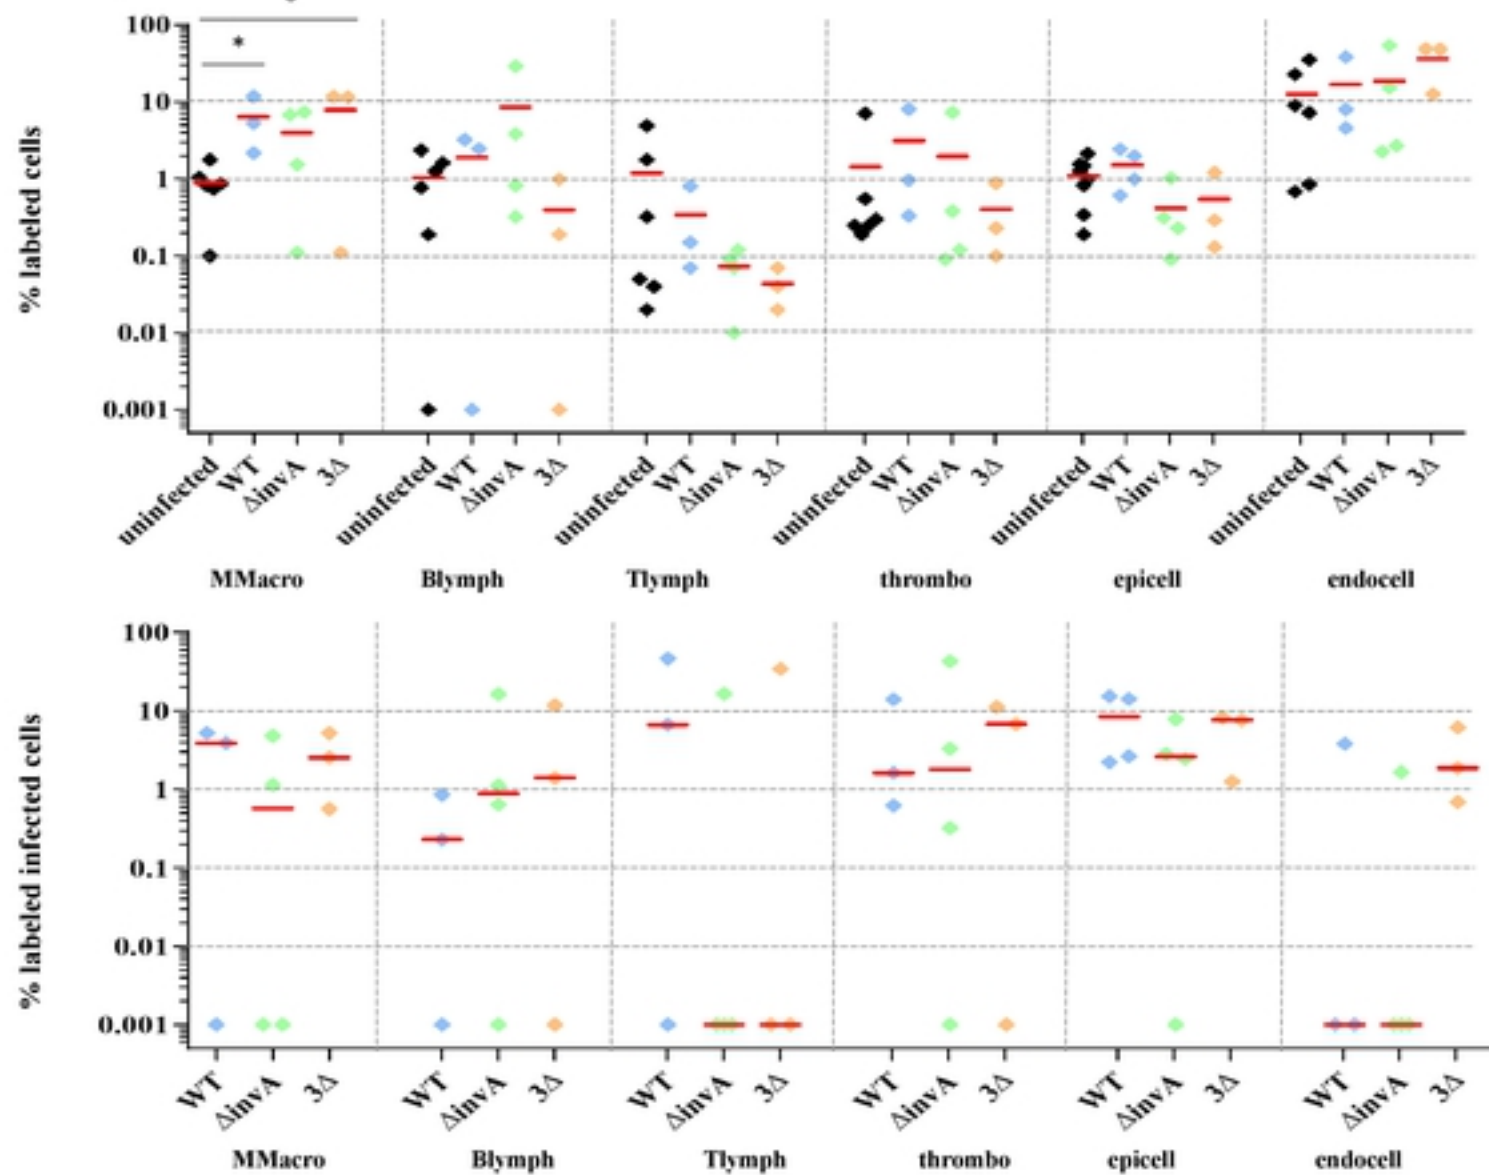

Figure 5

Fig 6. Cell types and *Salmonella* infected cells

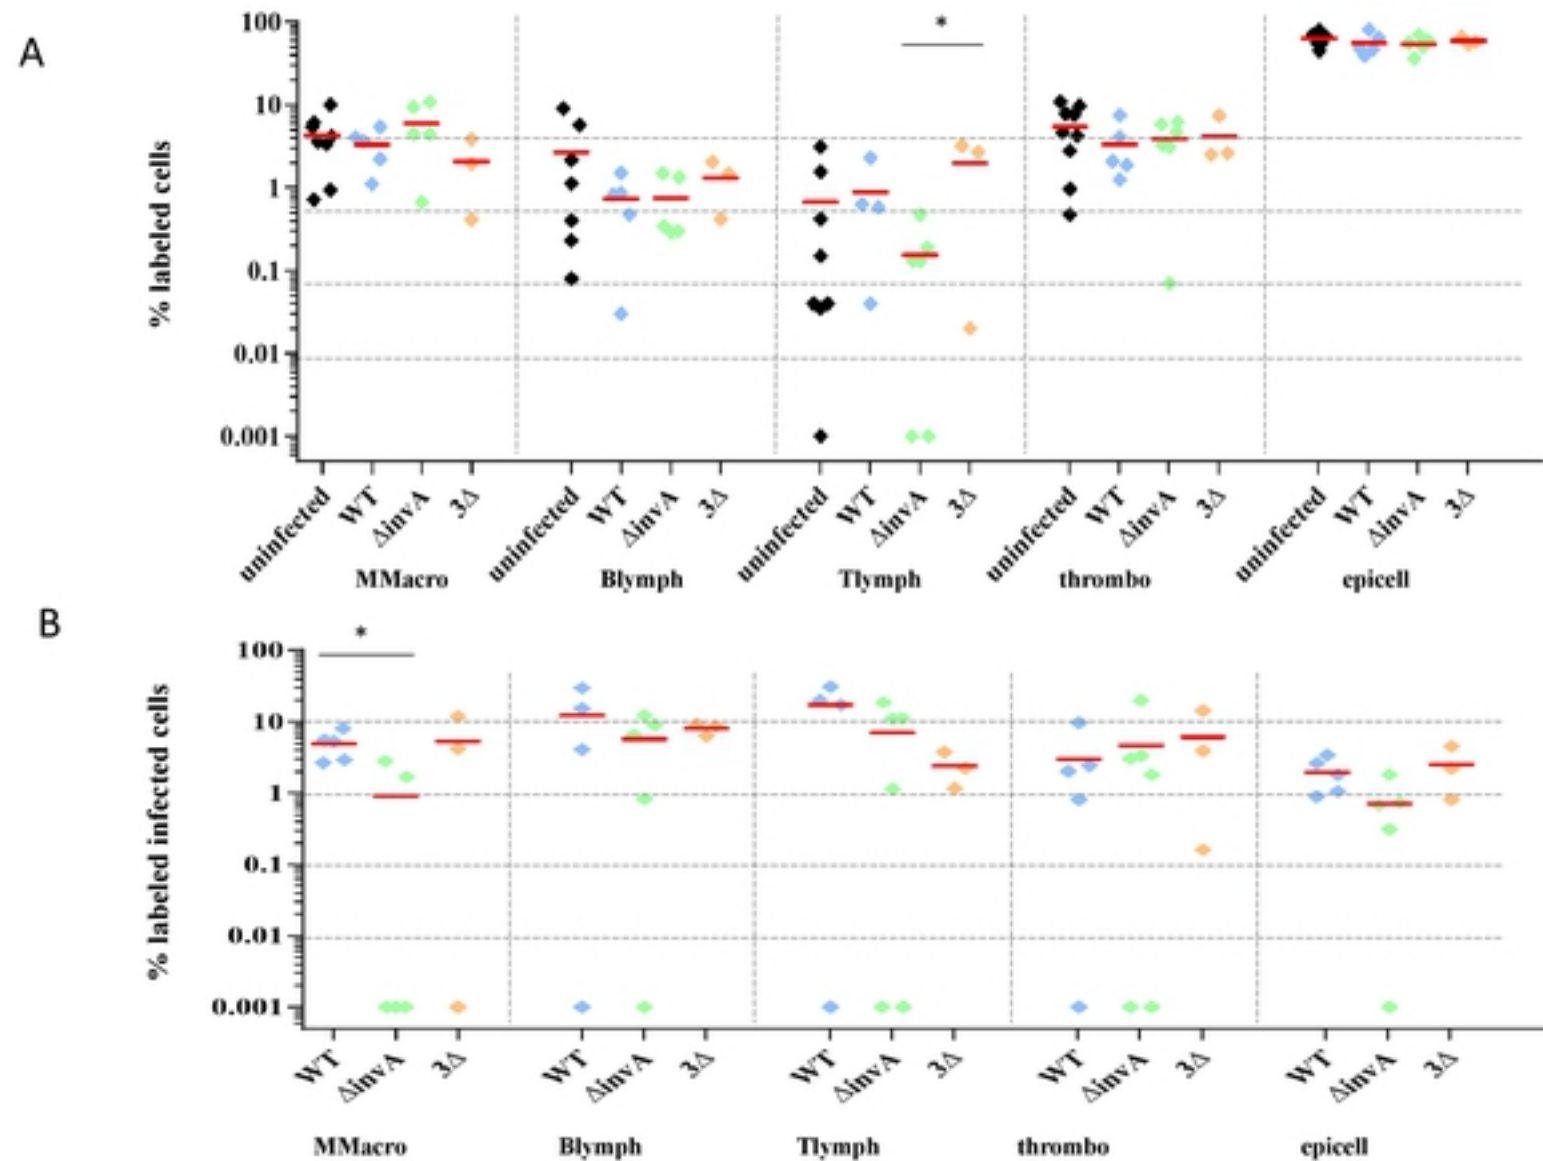

Figure 6

Fig 7. Immunohisto-chemistry of the chicks gall bladder

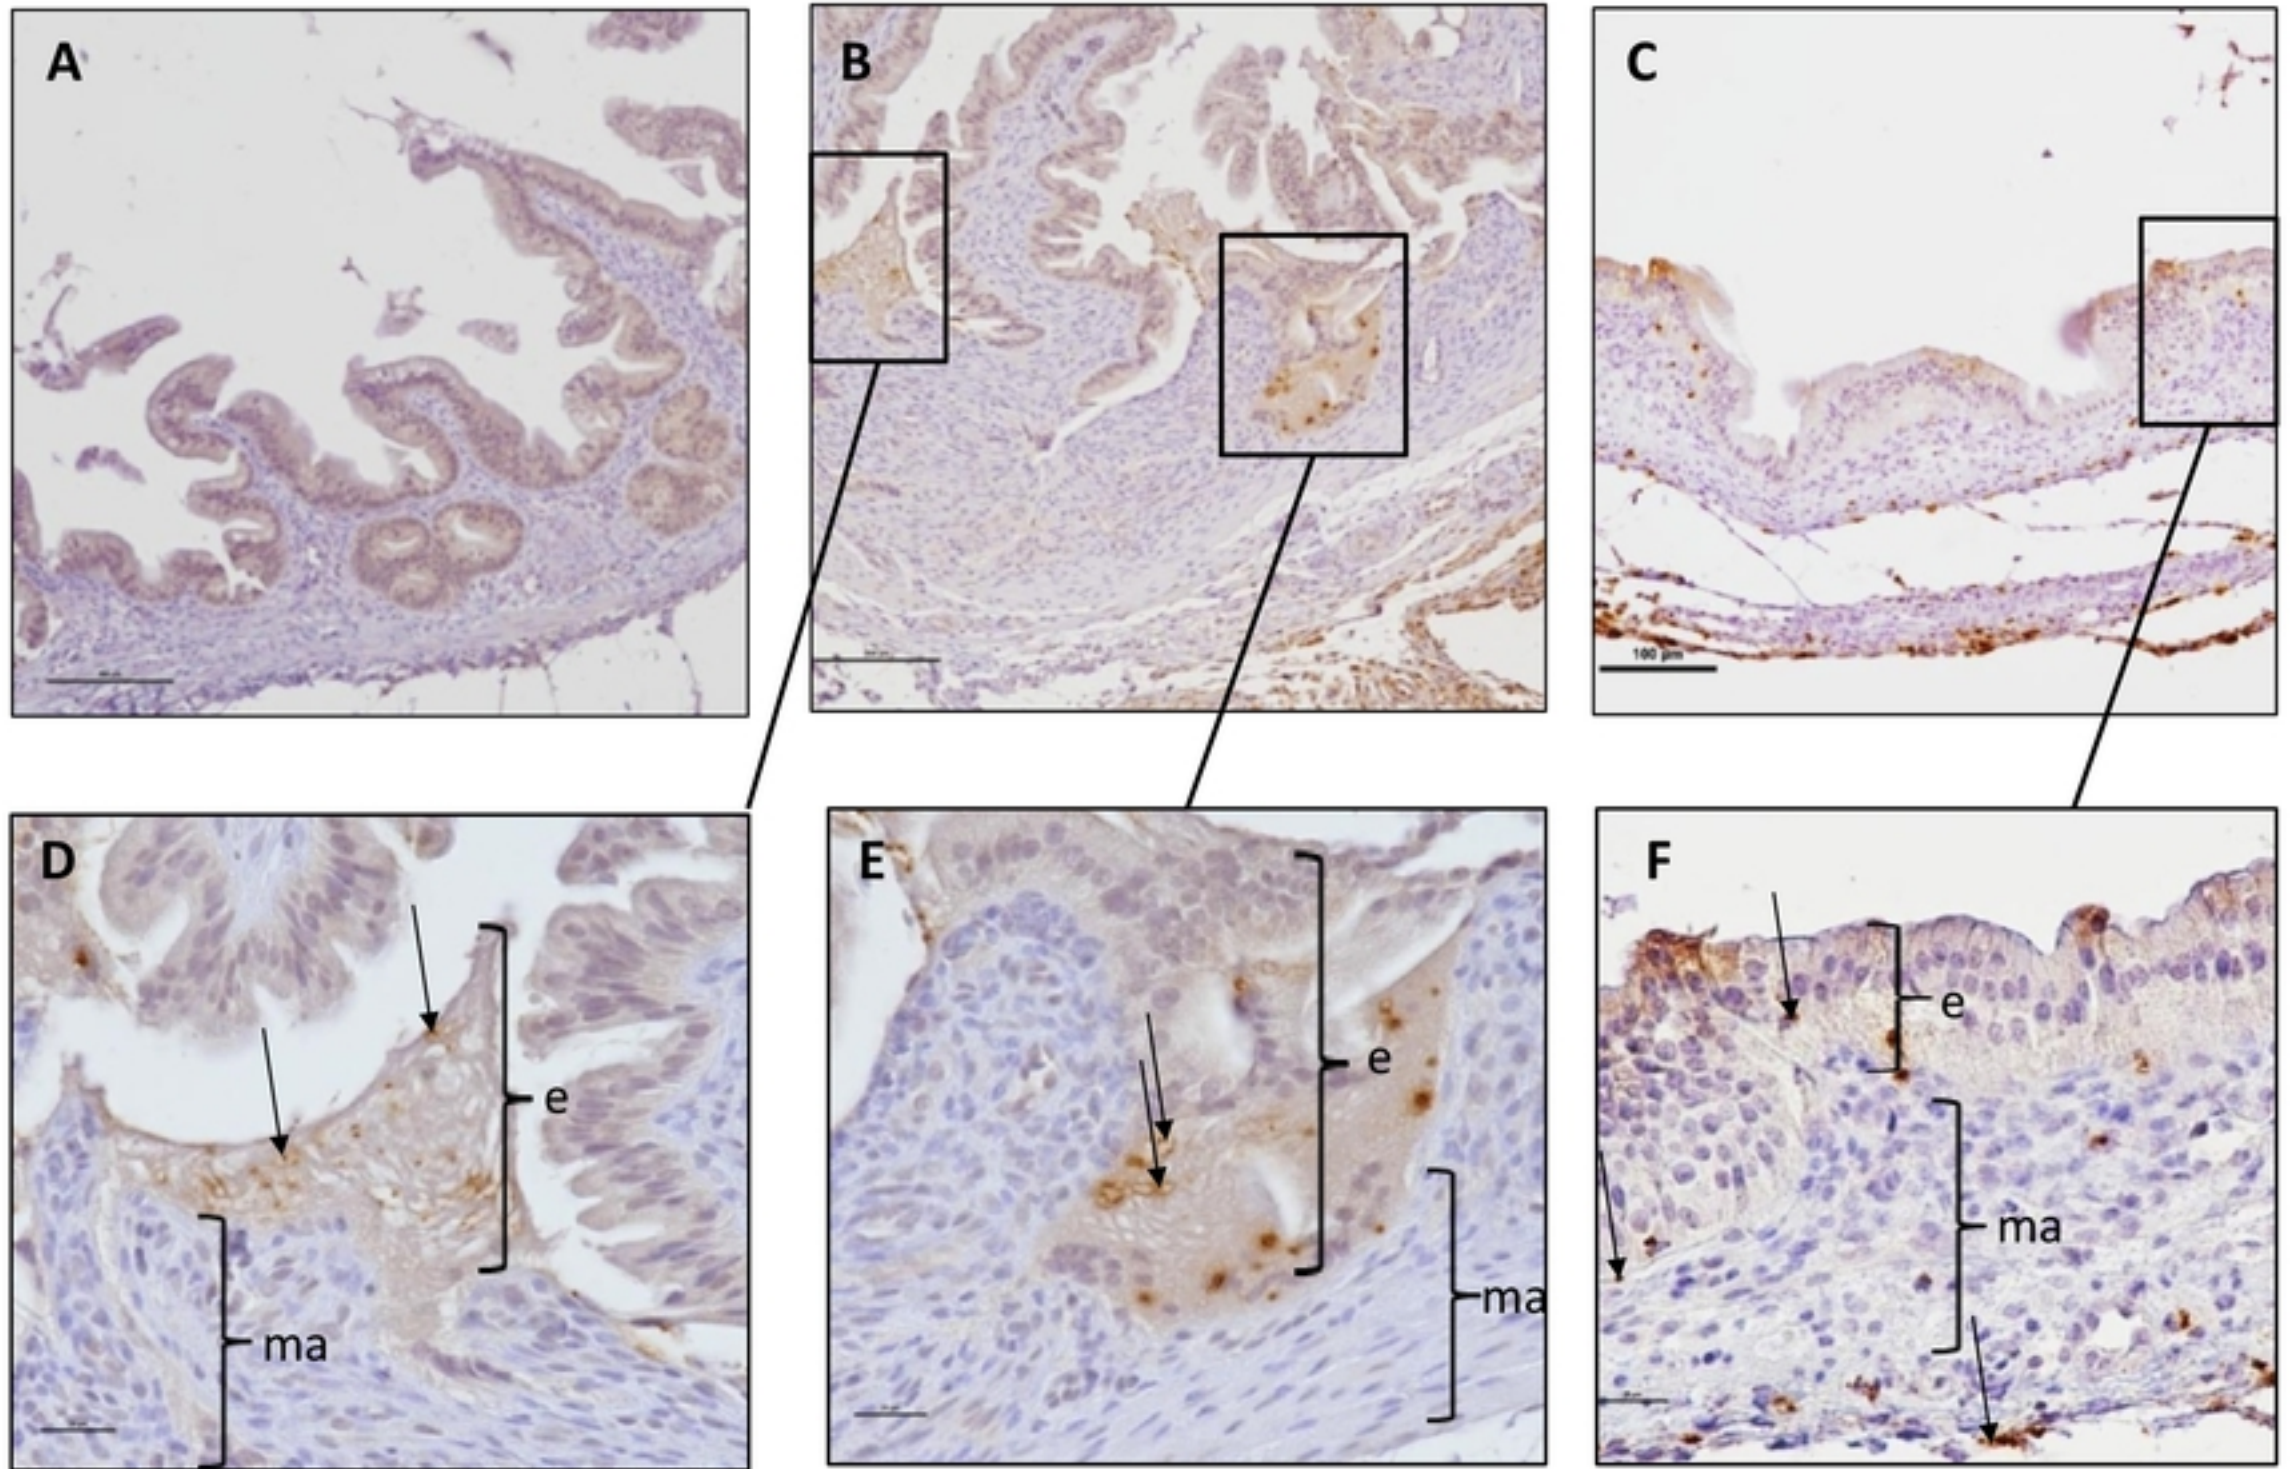

Figure 7

Fig 8. Persistence of the bacteria in the spleen and the gall bladder

A. Spleen

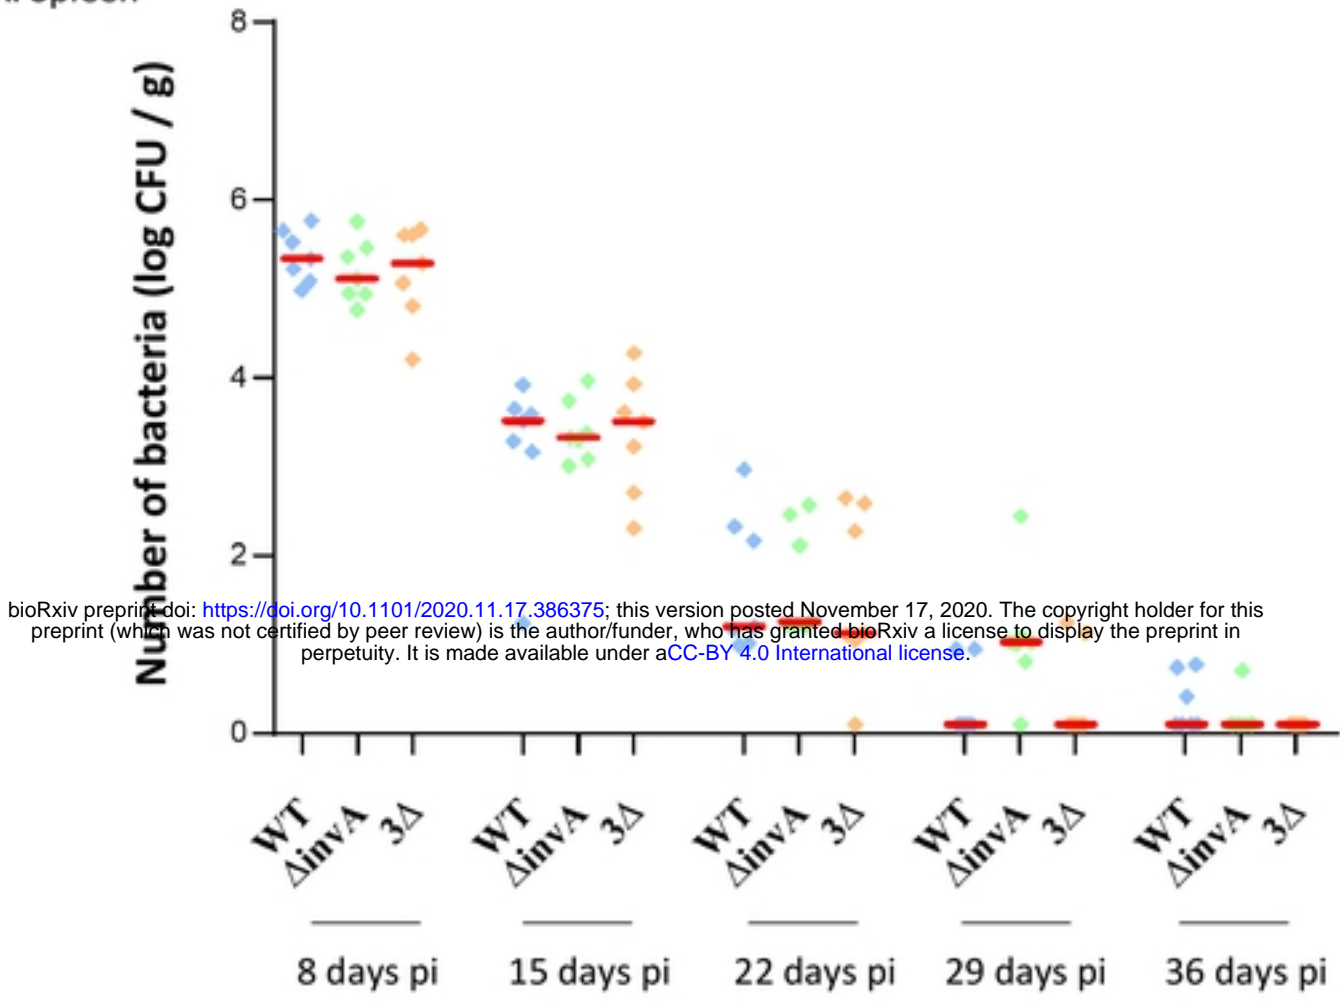

B. Gall bladder

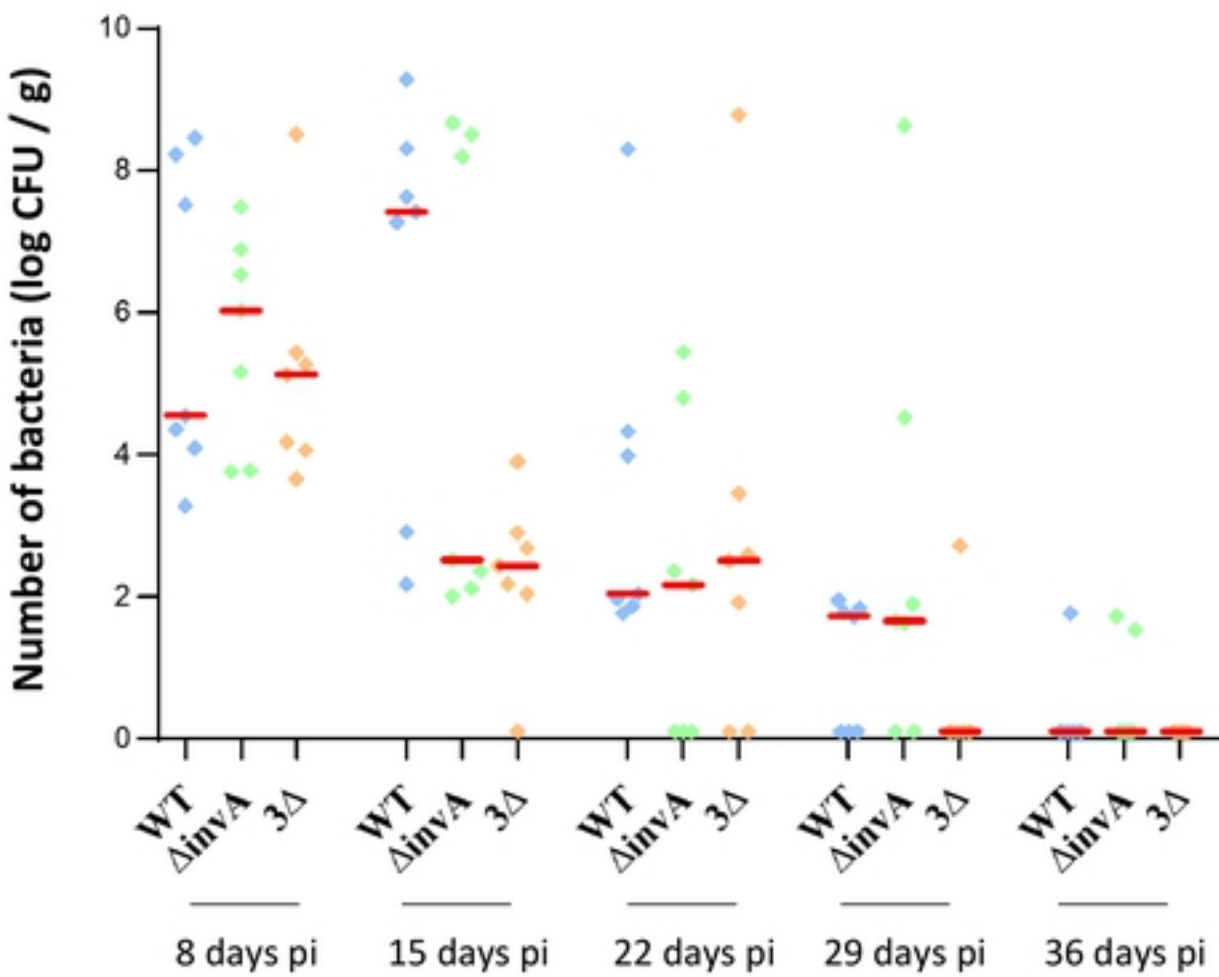

Source: http://biorxiv.org/content/10.1101/2020.11.17.386375v1.full.pdf
